1 **The CHK-2 antagonizing phosphatase PPM-1.D regulates**  
2 **meiotic entry via catalytic and non-catalytic activities**

3  
4  
5

6 **Authors:**

7 Antoine Baudrimont<sup>1</sup>, Dimitra Paouneskou<sup>1,6</sup>, Ariz Mohammad<sup>2,6</sup>, Raffael  
8 Lichtenberger<sup>3</sup>, Joshua Blundon<sup>4</sup>, Yumi Kim<sup>4</sup>, Markus Hartl<sup>5</sup>, Sebastian Falk<sup>3</sup>, Tim  
9 Schedl<sup>2</sup>, Verena Jantsch<sup>1,\*</sup>.

10

11 **Affiliations:**

12 <sup>1</sup> Department of Chromosome Biology, Max Perutz Labs, University of Vienna, Vienna  
13 Biocenter, Austria.

14 <sup>2</sup> Department of Genetics, Washington University School of Medicine, St. Louis, United  
15 States.

16 <sup>3</sup> Department of Structural and Computational Biology, Max Perutz Labs, University of  
17 Vienna, Vienna Biocenter, Austria.

18 <sup>4</sup> Department of Biology, Johns Hopkins University, Baltimore, MD, United States.

19 <sup>5</sup> Mass Spectrometry Facility, Max Perutz Labs, Vienna BioCenter, Vienna, Austria.

20

21 **Author list footnotes**

22 <sup>6</sup> equal contribution

23

24 **Contact info**

25 \* correspondence: [verena.jantsch@univie.ac.at](mailto:verena.jantsch@univie.ac.at)

26

## 27 Summary

28  
29 The transition from the stem cell/progenitor fate to meiosis is mediated by several  
30 redundant post-transcriptional regulatory pathways in *C. elegans*. Interfering with all  
31 three branches causes tumorous germlines. SCF<sup>PROM-1</sup> comprises one branch and  
32 mediates a scheduled degradation step at entry into meiosis. *prom-1* mutants show  
33 defects in timely initiation of events of meiotic prophase I, resulting in high rates of  
34 embryonic lethality. Here, we identify the phosphatase PPM-1.D/Wip1 as crucial  
35 substrate for PROM-1. We report that PPM-1.D antagonizes CHK-2 kinase, a key  
36 regulator for meiotic prophase initiation e.g., DNA double strand breaks, chromosome  
37 pairing and synaptonemal complex formation. We propose that PPM-1.D controls the  
38 amount of active CHK-2 by both catalytic and non-catalytic activities, where strikingly  
39 the non-catalytic regulation seems to be crucial at meiotic entry. PPM-1.D sequesters  
40 CHK-2 at the nuclear periphery and programmed SCF<sup>PROM-1</sup> mediated degradation of  
41 PPM-1.D liberates the kinase and promotes meiotic entry.

42

43

44

## 45 Keywords

46 *C. elegans* meiosis, *C. elegans* germline, meiotic entry control, PPM-1.D phosphatase,  
47 CHK-2

48

49

## 50 Introduction

51 The transition from the dividing stem/progenitor cell fate to meiosis is a key step  
52 in producing gametes (Hubbard and Schedl, 2019). In the germline this crucial  
53 differentiation step is governed by three parallel pathways involved in post-  
54 transcriptional gene regulation in *C. elegans*. These include the GLD-1, GLD-2 and  
55 SCF<sup>PROM-1</sup> pathways that act by translational repression, polyA tail mediated  
56 translational activation and targeted protein degradation, respectively (Mohammad et  
57 al., 2018). The pathways operate redundantly, which means that only double mutants  
58 interfering with at least two pathway branches lead to over-proliferative germlines and  
59 failure in meiotic entry. Triple mutants affecting all three pathways produce highly  
60 tumorous germlines with little or no expression of meiotic markers (Mohammad et al.,  
61 2018). In the progenitor zone, where cells undergo mitotic cell cycling and pre-meiotic  
62 replication, the activities of the three pathways required for meiotic entry are  
63 downregulated by GLP-1/Notch signaling (Hansen et al., 2004; Mohammad et al.,  
64 2018).

65 The continuous replenishment of meiocytes through divisions in the progenitor  
66 zone displaces cells proximally at a rate of approximately one cell row/hour through the  
67 germline (Crittenden et al., 2006). After one round of meiotic S-phase, cells enter  
68 prophase of meiosis I (leptonema, zygonema, pachynema, diplonema, and diakinesis),  
69 which is organized as a spatio-temporal meiotic time course in the dissected gonads of  
70 *C. elegans* hermaphrodites (Hillers et al., 2017). The generation of gametes via meiosis  
71 requires two divisions. In meiosis I, parental homologous chromosomes (one from each  
72 parent) are separated and in meiosis II, each chromosome splits into its two sister  
73 chromatids.

74 The physical linkage between homologs aids their correct segregation. This  
75 linkage is a result of programmed induction of DNA double strand breaks (DSBs),  
76 pairwise alignment of the homologous chromosomes, which are organized in loops  
77 tethered to the meiotic chromosome axis, installation of the synaptonemal complex (SC)  
78 between the paired homologs and repair of the DSBs using a chromatid of the parental  
79 homolog via homologous recombination (Gerton and Hawley, 2005). A further highly  
80 conserved feature in prophase of meiosis is the chromosome end led movements, which  
81 promote the pairwise alignment of the homologous chromosomes and the installation of  
82 the SC between them (Link and Jantsch, 2019). These events must be coordinated to  
83 achieve normal disjunction at the meiotic divisions.

84 *prom-1* mutants show defects in timely and coordinated initiation of these events  
85 (Jantsch et al., 2007). The mutants have an extended meiotic entry zone, characterized  
86 by the presence of meiotic cohesion, chromosome axes and SC proteins as poly-  
87 complexes, indicating that the proteins are produced and await assembly onto  
88 chromosomes. Furthermore, despite apparent completion of meiotic S-phase, DSB  
89 induction and repair and all signs of the prophase chromosome movements are  
90 delayed. These pleiotropic defects result in a mix of univalent and bivalents, which leads  
91 to chromosome mis-segregation and high embryonic death (Jantsch et al., 2007).

92 In *C. elegans*, the DNA damage signaling kinase CHK-2 acts as a key regulator  
93 of prophase meiotic processes. *chk-2* mutants are defective in DSB induction, SC  
94 formation, chromosome movements and lack meiotic feedback control that permits  
95 bivalent formation (Castellano-Pozo et al., 2020; Kim et al., 2015; Link et al., 2018;  
96 MacQueen and Villeneuve, 2001; Penkner et al., 2009; Rosu et al., 2013; Sato et al.,  
97 2009; Stamper et al., 2013; Woglar and Jantsch, 2013). The nuclear envelope protein  
98 SUN-1, which is involved in the chromosome movements, is a prominent substrate of  
99 CHK-2 and phosphorylated SUN-1 serine 8 (SUN-1(S8Pi)) marks meiotic entry  
100 (Penkner et al., 2009) and is used as a marker for CHK-2 kinase activity throughout this  
101 study. Fundamentally different from the *prom-1* mutants, *chk-2* mutants show normal  
102 axes morphogenesis (Tang et al., 2010).

103 *prom-1* encodes an F-box protein homologous to human FBX047 (Jantsch et al.,  
104 2007; Simon-Kayser et al., 2005). Together with a cullin and an Rbx protein, PROM-1  
105 is part of a multi-subunit E3 ubiquitin ligase complex (called SCF) (Nayak et al., 2002),  
106 which mediates recognition and binding of the E2 ubiquitin-conjugating enzyme to the  
107 substrate, which is consecutively targeted for degradation. We still do not have a  
108 comprehensive picture of which proteins need to be subjected to the programmed  
109 degradation step at the transition between the stem/progenitor cell fate and meiotic  
110 differentiation. Whereas the cyclin, CYE-1, has been identified as one of the targets of  
111 SCF<sup>PROM-1</sup>, *cye-1* inactivation failed to rescue the pronounced meiotic entry delay seen  
112 in *prom-1* mutant worms (Mohammad et al., 2018).

113 In this study, we report the identification of *ppm-1.D* as a potent suppressor of  
114 the embryonic lethality associated with the *prom-1* mutants. *prom-1* defects in meiotic  
115 entry are largely reversed and key meiotic processes of prophase I restored. *ppm-1.D*  
116 encodes a serine/threonine phosphatase in the PP2C family that is orthologous to  
117 human *PPM1D* (formally known as *WIP1*). We provide evidence that PPM-1.D acts as



118 an antagonizing phosphatase to the meiotic regulator CHK-2, which it can keep inactive  
119 by a mere sequestration mechanism (non-catalytic activity) in the progenitor zone  
120 compartment. Nevertheless, PPM-1.D regulates meiotic entry via both catalytic and  
121 non-catalytic activities and therefore *ppm-1.D* null mutants display features of premature  
122 meiotic entry. Thus we present a yet undescribed role for the PPM-1.D phosphatase,  
123 besides its known involvement in the response to DNA damage in somatic cells (Le  
124 Guezennec and Bulavin, 2010). This study provides incentives to test whether human  
125 PPM1D is also a substrate for degradation by the human *prom-1* F-box protein homolog,  
126 FBX047, where mutations in the gene have been associated with renal carcinoma  
127 (Simon-Kayser et al., 2005). Furthermore, *PPM1D* is often found up-regulated in cancer  
128 cells (Le Guezennec and Bulavin, 2010).

## 129 Results

### 130 Identification of *ppm-1.D* as a *prom-1* target

131 *prom-1* encodes an F-box protein and is part of the SCF E3 ubiquitin ligase  
132 complex, which targets substrate proteins for degradation by the proteasome (Jantsch  
133 et al., 2007; Mohammad et al., 2018; Nayak et al., 2002) (Figure 1.A). We tagged  
134 PROM-1 at its carboxy-terminus and examined its expression levels throughout the *C.*  
135 *elegans* germline (see Table S1 for functionality of the tagged line). We co-stained  
136 PROM-1::HA with the cohesion regulator WAPL-1, which shows a characteristic nuclear  
137 staining in the progenitor zone with a pronounced drop at meiotic entry (Crawley et al.,  
138 2016) (Figure 1.B, left, cyan). Quantification of the normalized signal intensity of PROM-  
139 1 revealed that it started to rise ~10 cells diameters (rows) from the distal tip of the  
140 germline and reached its maximum level ~20 cell diameters from the distal tip (Figure  
141 1.B). The peak is ~20 fold above the base in the distal most germ cells and coincides  
142 with the end of the progenitor zone marked by WAPL-1 (Figure 1. B, right, cyan triangle).  
143 The increase in the levels of PROM-1 right at meiotic entry suggests the presence of  
144 targets for regulated degradation to promote entry into meiosis, consistent with the  
145 *prom-1* mutant phenotype with the characteristic extended meiotic entry zone (Jantsch  
146 et al., 2007).

147 To identify targets of SCF<sup>PROM-1</sup>, we conducted a suppressor screen in search of  
148 mutants that would rescue the low viability of *prom-1(ok1140)* ( $15 \pm 10\%$ ,  $n = 7$   
149 hermaphrodites) (see materials and methods and Figure S1.A). We isolated the allele  
150 *jf76*, which mapped to the *ppm-1.D* gene. Combining *jf76* with *prom-1* leads to a  
151 significantly improved hatch rate of  $79 \pm 14\%$  ( $n = 10$  hermaphrodites) (Figure S1.B).

152 Further cytological examination of the double mutant *prom-1(ok1140); ppm-*  
153 *1.D(jf76)* revealed: 1) the timely restoration of the appearance of the leptonema-  
154 zygonema after the meiotic entry zone (MEZ, comprising the 2-3 nuclear cell rows in  
155 the wild type, where SC proteins have been expressed, but not yet loaded onto  
156 chromosomes (Jantsch et al., 2007)) contrasting the extended MEZ in *prom-1(ok1140)*  
157 (Figure 1.C), 2) the loading of the meiotic cohesion REC-8 and chromosome axial  
158 proteins (as shown for HTP-3 (Goodyer et al., 2008)), and extension of the SC (as  
159 shown for SYP-1 (MacQueen et al., 2002; Schild-Prufert et al., 2011)) (Figure 1.D). We  
160 noticed that in the double mutant the transition zone (comprising leptonema and  
161 zygonema) was prolonged and that HTP-3, SYP-1 and REC-8 persisted longer in  
162 aggregates than in the wild type. Nevertheless, at the proximal end of the transition zone

163 the chromosome axes and the SC appeared fully decorated with the relevant markers  
164 (Figure 1.D) and 3) and the formation of six bivalents compared to the mixture of  
165 univalent and bivalents in the *prom-1(ok1140)* single mutant (Figure 1.C, insets).  
166 Consistent with the efficient formation of bivalents, pairing of homologous chromosomes  
167 and RAD-51 loading were restored to wild-type levels in the *prom-1(ok1140); ppm-*  
168 *1.D(jf76)* double mutant (Figure S1.C,D).

169 In summary, we showed that PROM-1 protein levels peak at meiotic entry and  
170 that the *ppm-1.D(jf76)* mutant can efficiently suppress the *prom-1* phenotype as  
171 evidenced by restoration of high hatch rates of embryos laid by the double mutant.

172  
173 PPM-1.D encodes a conserved PP2C phosphatase and protein abundance  
174 is regulated by the SCF<sup>PROM-1</sup> complex.

175 The *ppm-1.D* gene is conserved from *C. elegans* to human (Figure 2.A) and is  
176 known for its involvement in the DNA damage response in mammals (Goloudina et al.,  
177 2016). PPM1.D is a chromatin-bound phosphatase targeting  $\gamma$ H2AX, ATM, CHK1,  
178 CHK2, MDM2, and p53 and reverses effects of ATM-dependent mitotic cell cycle arrest  
179 triggered by DNA damage. In animal cells, the amount of the chromatin-bound  
180 PPM1D/WIP1-ATM complex regulates the duration of cell cycle arrest after DNA  
181 damage induction (Jaiswal et al., 2017).

182 *C. elegans* PPM-1.D has a phosphatase type 2C domain (PP2C) (Figure 2.B)  
183 classifying it as a member of the corresponding phosphatases family (Bork et al., 1996).  
184 The allele *jf76*, which suppresses the high level of embryonic death in the *prom-1*  
185 mutant, bears a G to C transversion that abolishes splicing and leads to a premature  
186 stop codon. This leads to the loss of the last two exons similar to the *tm8369* allele  
187 (Figure 2.B). Of note, these truncation alleles still carry the well-conserved PP2C  
188 domain (Figure 2.B). Therefore, we also generated a deletion null allele of *ppm-1.D*  
189 (*jf120*) (Figure 2.B). We validated this allele as a null by qRT-PCR (Figure S2.A). Both  
190 the truncation and null alleles displayed a small increase in embryonic lethality  
191 originating both from defective oogenesis and spermatogenesis (Figure S2.B and C).  
192 At very low frequency ( $2.6 \pm 1.0$  %, mean  $\pm$  SD, n=1914), homozygous null *ppm-1.D*  
193 mutants sired progeny with abnormal body morphology indicating developmental  
194 defects (Figure S2.D).

195 Immunodetection of the tagged PPM-1.D (see Table S1 for functionality of the  
196 tagged lined) revealed a strong nuclear signal throughout the progenitor zone, which

197 disappeared as soon as cells entered meiosis (Figure 2.C, top). The nuclear signal  
198 displayed a marked intensity increase at the nuclear periphery. In the proximal germline,  
199 PPM-1.D signal reappeared in diplonema as foci (Figure 2.C, middle) and later on a  
200 strong nuclear signal with enrichment at the nuclear periphery can be seen at diakinesis  
201 (Figure 2.C, bottom). The human ortholog PPM1D was reported as being expressed in  
202 response to p53 induction (Fiscella et al., 1997). CEP-1 (worm p53) is co-expressed in  
203 the germline progenitor zone (e.g., (Dello Stritto et al., 2021)), we therefore examined  
204 tagged PPM-1.D in the *cep-1* mutant (Figure S3.A). PPM-1.D expression was  
205 independent of *cep-1* in the germline. To test whether PPM-1.D is a substrate of the  
206 SCF<sup>PROM-1</sup> ubiquitin ligase for targeted protein degradation, we examined the  
207 localization of PPM-1.D in the *prom-1(ok1140)* deletion background. In the *prom-*  
208 *1(ok1140)* mutant, PPM-1.D failed to disappear at meiotic entry and was detected at all  
209 stages of meiotic prophase (Figure 2.D), suggesting scheduled degradation of PPM-1.D  
210 by SCF<sup>PROM-1</sup>.

211 To test whether PPM-1.D is a direct PROM-1 substrate, we took advantage of  
212 the yeast *Saccharomyces cerevisiae* containing the conserved SCF complex subunits,  
213 but lacking a PROM-1 homolog. When PPM-1.D or PROM-1 are individually expressed  
214 in yeast, each protein was readily detected by Western blot. However, as soon as  
215 PROM-1 and PPM-1.D were co-expressed, PPM-1.D levels were significantly reduced  
216 (Figure 2.E, left). Addition of the proteasome inhibitor MG132 to cells co-expressing  
217 PROM-1 and PPM-1.D led to a 6 fold increase in PPM-1.D levels (Figure 2.E, right)  
218 reinforcing that the observed reduction of PPM-1.D is due to PROM-1 mediated  
219 degradation. This finding supports the idea that PPM-1.D is a target of the SCF<sup>PROM-1</sup>  
220 complex.

221 PPM-1.D is a conserved protein, well known for its role in the response to DNA  
222 damage in mammals (Shaltiel et al., 2015). Here, we identify a novel activity, at the  
223 stage of meiotic entry, when meiotic progenitor cells differentiate. PPM-1.D has to be  
224 degraded by SCF<sup>PROM-1</sup> to mediated scheduled meiotic entry.

225

## 226 CHK-2 and PPM-1.D are found together in protein complexes

227 As deleting *ppm-1.D* significantly rescues the meiotic *prom-1* mutant phenotypes  
228 and PPM-1.D is mostly expressed in the progenitor zone, we used endogenously  
229 tagged *ha::ppm-1.D* to determine the PPM-1.D interactome. Biochemical fractionation  
230 of germline cells revealed that PPM-1.D was enriched in the nuclear soluble and

231 insoluble fractions (Figure 3.A). This is in agreement with our cytological analysis that  
232 PPM-1.D is detected in the nucleoplasm and is enriched at the nuclear rim (Figure 1.B).

233 Next, triplicated immuno-precipitation pull-down experiments of HA::PPM-1.D  
234 using the pooled nuclear fractions followed by mass spectrometry analysis revealed  
235 CHK-2 as a reproducible consistent interactor (Table S2). CHK-2 is a key meiotic  
236 regulator, involved in controlling numerous prophase I events in *C. elegans* (MacQueen  
237 and Villeneuve, 2001). To confirm the top-listed PPM-1.D-CHK-2 interaction, we  
238 endogenously tagged CHK-2 with a HA tag at the carboxy-terminus (see Table S1 for  
239 functionality) and performed triplicated immunoprecipitation experiments, followed by  
240 mass spectrometry analysis. Consistently, PPM-1.D was found in protein complexes  
241 containing CHK-2 kinase as top hit (Table S2).

242

### 243 PPM-1.D and CHK-2 reside inside the nucleus

244 Since PPM-1.D and CHK-2 were reciprocally found as prime interactors in co-  
245 immunoprecipitations, we asked whether PPM-1.D and CHK-2 would also reside in the  
246 same sub-cellular compartments *in vivo*; (comprehensive CHK-2 localization in the  
247 germline has not been reported to date). We generated a strain expressing both  
248 HA::PPM-1.D and CHK-2::3xFLAG (for functionality of the CHK-2::3x FLAG, see Table  
249 S1) and examined their co-localization using STED microscopy. In the progenitor zone,  
250 PPM-1.D and CHK-2 showed striking co-localization in the nucleus, where both proteins  
251 were enriched at the nuclear periphery (Figure 3.B) and showed a high degree of  
252 staining overlap (automatic threshold Manders coefficient: CHK-2 =  $0.86 \pm 0.06$ , PPM-  
253 1.D =  $0.89 \pm 0.05$ , average  $\pm$  SD, 4 nuclei).

254 To assess whether the enrichment of CHK-2 at the nuclear rim was inside or  
255 outside the nuclear membrane, we employed electron microscopy with immunogold  
256 labeling. After validating the specificity of the antibody (Figure S4), we focused on the  
257 nucleopores. In the cryo-sections from progenitor zone nuclei, CHK-2 was in the close  
258 vicinity of the nucleopore in 38% of cases (13 out of 34 nucleopores) (Figure 3.C). At  
259 this resolution CHK-2 was found highly enriched in the nucleus both at the nuclear rim  
260 and inside the nucleus and a smaller fraction was detected in the cytoplasm (Figure  
261 3.D). To quantify the signal, we divided each nucleus in three zones of equal area  
262 (zones 1, 2 and 3, Figure 3.E) and a fourth zone (zone 0) that is equidistant from the  
263 nuclear membrane as the zone 1 and represents the vicinity just outside of the nucleus.  
264 In each zone, we counted the number of gold particles detected in progenitor zone

265 nuclei (Figure 3.F, n=20 nuclei). CHK-2 was mostly nuclear:  $84.1 \pm 9.6\%$  of the gold  
266 particles were inside the nucleus and enriched in zone one ( $41.3 \pm 6.2\%$ ), just interior  
267 to the nuclear membrane. We conclude that in germline progenitor zone nuclei, CHK-2  
268 is inside the nucleus and PPM-1D and CHK-2 strongly co-localize at the nuclear  
269 periphery.

270

## 271 PPM-1.D directly interacts with CHK-2

272 As PPM1.D and CHK-2 were found associated in complexes and shared the  
273 same territories inside the nucleus we tested whether the *C. elegans* proteins interacted  
274 directly. To this aim we constructed MBP-PPM-1.D-10xHIS and GST-CHK-2-3xFLAG  
275 and expressed these proteins in *E. coli*. Both proteins were expressed and detectable  
276 in the cell lysates (Figure 3.G, input lanes). Next, we subjected the cell lysates to pull-  
277 down assays using amylose beads. Amylose beads purified MBP-PPM-1.D-10xHIS  
278 (Figure 3.G, first lane, amylose resin + anti-HIS, long exposure), and GST-CHK-2-  
279 3xFLAG displayed weak unspecific binding to the beads (Figure 3.G, second lane,  
280 amylose resin + anti-FLAG). When independent cultures of MBP-PPM-1.D-10xHIS and  
281 GST-CHK-2-3xFLAG were co-lysed and subjected to pull-downs, MBP-PPM-1.D-  
282 10xHIS co-purified GST-CHK-2-3xFLAG reproducibly (Figure 3.G, third lane, amylose  
283 resin + anti-FLAG), which suggests that PPM-1.D and CHK-2 can directly interact.

284 Next, we examined the binding of the truncated PPM-1.D protein lacking the last  
285 two exons (corresponding to the (*tm8369* or *jf76*) alleles, further referred to as truncated  
286 PPM-1.D) (Figure 2.B). Truncated PPM-1.D appeared more stable and more strongly  
287 expressed than the full-length protein in *E. coli* (Figure 3.G, fourth lane, input, anti-HIS),  
288 and was very efficiently purified using amylose beads (Figure 3.G, fourth lane, amylose  
289 resin + anti-HIS, short exposure). When CHK-2 was co-lysed with truncated PPM-1.D,  
290 we could only pull down low levels of CHK-2, when compared to normalized amounts  
291 of protein with full length PPM-1.D (Figure 3.G, fifth lane, amylose resin + anti-FLAG  
292 and Figure 3.H).

293 We also tested nonspecific sticking of CHK-2 protein to the MBP affinity tag. We  
294 expressed the unrelated protein, human NRDE2, (10xHIS-MBP-3C-NRDE2 $\Delta$ N) with a  
295 similar molecular weight as PPM-1.D. After validating that we could efficiently purify  
296 10xHIS-MBP-3C-NRDE2 $\Delta$ N (Figure 3.G, sixth lane, short exposure, amylose resin +  
297 anti-HIS), we co-lysed GST-CHK-2-3xFLAG and MBP-3C-NRDE2 $\Delta$ N-10xHIS  
298 expressing bacteria and performed MBP pull downs. We found that CHK-2 could be



299 pulled down to similar levels with 10x-His-MBP-3C-NRDE2 $\Delta$ N and MBP-3C-PPM-1.D-  
300 truncated-10xHIS (Figure 3.G, fifth and seventh lane respectively, amylose resin + anti-  
301 FLAG). As the truncated PPM-1.D and NRDE2 are both significantly higher expressed  
302 than the full-length PPM-1.D (Figure 3.G, first and third to seventh lane, compare short  
303 and long exposure, amylose resin + anti-HIS) and they both pull-downed similar  
304 amounts of CHK-2 (Figure 3.G, fifth and seventh lane, anti-FLAG), we conclude that  
305 CHK-2 was mostly binding to the MBP affinity tag, rather than to the PPM-1.D truncated  
306 protein.

307 Quantification of the amount of CHK-2 pulled down, normalized to input PPM-  
308 1.D, revealed that CHK-2 binds full-length PPM-1.D 20 fold more efficiently than PPM-  
309 1.D lacking the C-terminus, encoded by the two last exons (Figure 3.H, bottom,  
310 quantification derived from 2 biological replicates). We thus conclude that the PPM-1.D  
311 C-terminus is necessary for efficient interaction with CHK-2 or for protein folding to allow  
312 for efficient interaction.

313

314 PPM-1.D restricts CHK-2 localization to the nuclear periphery.

315 We first examined the pattern of CHK-2 and PPM-1.D localization in the  
316 progenitor zone and as germ cells enter meiosis. CHK-2 is expressed in the progenitor  
317 zone, overlapping with PPM-1.D (Figure 3.B). Sub-cellularly, CHK-2 shows strong co-  
318 staining with PPM-1.D at the nuclear rim, in the progenitor zone. In contrast, at and after  
319 meiotic entry the enrichment at the nuclear rim is lost, with CHK-2 being mostly  
320 nucleoplasmic in spots at the nuclear periphery (Figure 4.A), where it presumably co-  
321 localizes with putative substrates (e.g., the pairing center proteins, (Kim et al., 2015) or  
322 SUN-1 aggregates). We next examined CHK-2 localization in *ppm-1.D(jf120)* null and  
323 in the C-terminal truncation mutant *ppm-1.D(tm8369)*, which does not interact with  
324 CHK-2, both efficiently suppress the *prom-1(ok1140)* null phenotype (Figure 4.A). In  
325 both *ppm-1.D* mutant alleles, CHK-2 lost its nuclear rim enrichment in the progenitor  
326 zone and only nucleoplasmic signal was visible (Figure 4.A). These results are  
327 consistent with a model that PPM-1.D promotes the localization of CHK-2, in an inactive  
328 state, to the nuclear rim in progenitor zone cells, and that when PROM-1 degrades PPM-  
329 1.D at meiotic entry, CHK-2 becomes nucleoplasmic and active. Furthermore, as *ppm-1.D(tm8369)*  
330 results in loss of CHK-2 rim enrichment, we conclude that the C-terminal  
331 protein tail of PPM-1.D is necessary for CHK-2 enrichment at the nuclear rim in the  
332 progenitor zone.

333 We then asked whether the catalytic activity of the PPM-1.D phosphatase was  
334 involved in the rim localization of both PPM-1.D and CHK-2. We mutated the aspartic  
335 acid (D) at position 274 to alanine to generate catalytic inactive PPM-1.D. D274 is highly  
336 conserved and part of the PP2C domain (Figure 4.A) and the exchange of aspartic acid  
337 to alanine was previously shown to abolish phosphatase catalytic activity (Takekawa et  
338 al., 2000). *ppm-1.D(jf182[PPM-1.D(D274A)])* was validated as genetically inactive PPM-  
339 1.D (Figure S5), since addition of hydroxy urea resulted in equal levels of dead eggs as  
340 seen with the *ppm-1.D(jf120)* null allele. We next investigated the localization of CHK-2  
341 in this mutant. Since CHK-2 nuclear rim staining was unaffected in *ppm-1.D[D274A]*,  
342 we conclude that PPM-1.D catalytic activity was not required for the nuclear rim  
343 enrichment of CHK-2 in the progenitor zone. Remarkably, this catalytic inactive allele of  
344 *ppm-1.D* failed to rescue the *prom-1* phenotype (Figure 4.A).

345 We also sought to explore whether PPM-1.D localization to the nuclear periphery  
346 was dependent on CHK-2. Inactivation of *chk-2* with the allele *me64*, or deletion of the  
347 earlier identified paralogous gene, T08D2.7 (MacQueen and Villeneuve, 2001),  
348 corresponding to *chkr-2(ok431)*, or the double mutant, did not affect PPM-1.D nuclear  
349 rim staining (Figure S6). We therefore concluded that PPM-1.D nuclear periphery  
350 enrichment is *chk-2* and *chkr-2* independent. Summarizing, the sequestration of CHK-2  
351 at the nuclear rim by PPM-1.D is independent of PPM-1.D phosphatase activity and  
352 CHK-2 activation does not require PPM-1.D phosphatase activity. Loss of PPM-1.D, via  
353 SCF<sup>PROM</sup> mediated degradation, appears sufficient to liberate CHK-2 from the nuclear  
354 rim and allow the kinase to phosphorylate to initiate meiosis.

355

## 356 PPM-1.D levels are regulating CHK-2

357 As the truncated allele of *ppm-1.D*, *tm8369*, retains the PP2C domain, we tagged  
358 the truncated protein to assess its expression. Truncated PPM-1.D displayed reduced  
359 nuclear staining without marked nuclear periphery enrichment when compared to the  
360 bright nuclear rim staining of wild-type PPM-1.D (Figure 4.B), reinforcing the idea that  
361 the C-terminal part of PPM-1.D is necessary for its nuclear periphery enrichment. Line  
362 profile analysis of the HA signal in *ha::ppm-1.D-truncated* across the nucleus showed  
363 that the detected signal is above the background level of the antibody measured on  
364 untagged worms (Figure 4.B, right). We then compared the mRNA levels of the full  
365 length and truncated *ppm-1.D* and this revealed that the mRNA of the truncated allele  
366 *ppm-1.D(tm8369)* is expressed at wild-type levels (Figure 4.C, left). We also quantified



367 the levels of both wild type and the truncated HA::PPM-1.D by western blot (Figure 4.C,  
368 center), normalized to histone H3. The protein level of truncated PPM-1.D was three  
369 fold reduced when compared to the wild type (Figure 4.C, right). We therefore, conclude  
370 that the C-terminal part of PPM-1.D is necessary for protein stability. Moreover, we  
371 found that truncated PPM-1.D is still recognized by SCF<sup>PROM-1</sup> for programmed/targeted  
372 degradation (Figure S7).

373 The loss of CHK-2 nuclear rim enrichment in the truncated allele (*tm8369*) could  
374 either be due to a reduction of PPM-1.D levels or due to the lack of the C-terminal part  
375 of PPM-1.D. To resolve the issue, we silenced the cytoplasmic nucleopore protein NPP-  
376 9 by RNAi to reduce the levels of PPM-1.D in the nucleus. This conditional knock-down  
377 of the nuclear pore gene *npp-9* led to a strong reduction of PPM-1.D staining in wild  
378 type, both in the nucleus and the nuclear rim. Moreover, silencing of *npp-9* was able to  
379 reproducibly rescue the *prom-1* mutant phenotype (Figure 4.D). In *prom-1* mutants the  
380 leptonema-zygonema-like zone extends, on average  $45 \pm 3$  ( $n = 6$ ) cell rows from the  
381 distal tip of the germline, whereas in *prom-1; npp-9 RNAi* it extends  $23 \pm 3$  ( $n = 10$ ) cell  
382 rows, which is similar to wild type ( $20 \pm 5$  cell rows,  $n = 16$ ).

383 We next examined PPM-1.D and CHK-2 localization in the *prom-1* mutant with  
384 and without *npp-9(RNAi)* to further comprehend this rescue. After *npp-9(RNAi)* PPM-  
385 1.D levels were reduced by three fold compared to wild-type levels (Figure 4.E, right)  
386 and at least seven times compared to *prom-1*. This three fold reduction was sufficient  
387 to promote scheduled meiotic entry as demonstrated by the timely phosphorylation of  
388 the CHK-2 substrate SUN-1 serine 8 (SUN-1(S8Pi), (Penkner et al., 2009). In addition,  
389 CHK-2 was localized both in the nuclear interior and nuclear rim associated. We  
390 conclude: 1) that the rim enrichment of CHK-2 is mediated though the C-terminal part  
391 of PPM-1.D and 2) that CHK-2 activity is responsive to the levels of PPM-1.D. Taken  
392 together, the C-terminal part of PPM-1.D is necessary for the localization of CHK-2 at  
393 the nuclear rim and the C-terminal truncation leads to instability of PPM-1.D. In addition  
394 the levels of PPM-1.D are regulating CHK-2 activity.

395  
396 **Loss of PPM-1.D mediated CHK-2 inhibition leads to premature meiotic**  
397 **entry**

398 PPM-1.D inhibits CHK-2. To promote meiotic entry, PPM-1.D is actively removed  
399 by SCF<sup>PROM-1</sup> mediated proteolysis leading to activation of CHK-2, which is strongly  
400 correlated with relocation from the nuclear periphery to the nuclear interior. To test

401 whether loss of PPM-1.D would lead to premature meiotic entry, we co-stained for CYE-  
402 1, a cyclin whose distal germline accumulation is restricted to the progenitor cell zone  
403 via SCF<sup>PROM-1</sup> mediated proteolysis at meiotic entry (Biedermann et al., 2009; Fox et al.,  
404 2011), and SUN-1(S8Pi), a meiotic prophase marker for CHK-2 activity (Penkner et al.,  
405 2009) (Figure 5.A, top). These two markers show largely mutually exclusive  
406 accumulation, with nuclei expressing both markers were only rarely observed in wild  
407 type (Figure 5.A). Strikingly, in the *ppm-1.D* null allele, we found a consistent overlap of  
408 CYE-1 and SUN-1(S8Pi) accumulation in all germlines analyzed (Figure 5.A, bottom).  
409 We interpret this finding as SUN-1(S8Pi) appearing prior to downregulation of CYE-1,  
410 because of premature activation of CHK-2.

411 We next examined staining in the *ppm-1.D* C-terminal truncation mutant, *tm8369*,  
412 also finding significant overlap of CYE-1 and pSUN-1 accumulation, although the extent  
413 of overlap was smaller than with the *ppm-1.D* null allele. Based on this difference, we  
414 hypothesize that both the catalytic activity and the C-terminal domain of PPM-1.D  
415 together contribute to CHK-2 inhibition/prevention of premature meiotic entry. To test  
416 this hypothesis, we mutated aspartic acid 274 (which leads to loss of catalytic activity)  
417 in the truncated *ppm-1.D* allele (intragenic double mutant *jf181*) and observed a  
418 significant increase in overlap between the two markers when compared to wild type or  
419 the C-terminal truncation allele (Figure 5.A, bottom). In contrast, removing only the  
420 catalytic activity of PPM-1.D did not lead to overlap between the markers. These results  
421 are in agreement with our previous observation that inactivation of the PPM-1.D catalytic  
422 domain alone was insufficient to rescue meiotic defects in *prom-1*. We propose that  
423 PPM-1.D exerts control over meiotic entry at two levels: 1) restraining CHK-2  
424 localization to the nuclear periphery and 2) dephosphorylation of CHK-2 and perhaps  
425 other targets.

426 We next asked: what is the relationship between meiotic S-phase and meiotic  
427 entry in *ppm-1.D* null mutant? We monitored DNA synthesis by EdU incorporation into  
428 chromosomes (Kocsisova et al., 2018). In wild type, in a 30-min pulse labeling, EdU  
429 incorporation and SUN-1(S8Pi) staining are mutually exclusive. Significantly, in the  
430 *ppm-1.D(jf120)* mutant, some cells entered meiosis (SUN-1(S8Pi) positive cells) despite  
431 having replication still going on (EdU positive) (Figure 5.B). This phenotype was  
432 exclusively observed in the *ppm-1.D* null allele.

433 As our results suggest that in the absence of PPM-1.D CHK-2 is prematurely  
434 activated, we looked for possible direct consequences that could arise from premature

435 CHK-2 induced meiotic entry. We reasoned that premature activation of CHK-2 might  
436 lead to uncoupling between meiotic chromosome axes formation, marked by HIM-3  
437 loading (Zetka et al., 1999) and SUN-1(S8Pi). HIM-3 loading is independent of CHK-2,  
438 in contrast to the SUN-1 phospho-modification (Tang et al., 2010). Indeed, SUN-1(S8Pi)  
439 positive nuclei were observed in which HIM-3 had not assembled onto the chromosome  
440 axes, which is never the case in the wild type (Figure 5.C, left). The uncoupling between  
441 HIM-3 and SUN-1(S8Pi) was more prominent and significant in the *ppm-1.D* null allele  
442 (Figure 5.C, right).

443 To validate that lack of PPM-1.D is sufficient to activate CHK-2, we took  
444 advantage of the *gld-1(q485) gld-2(q497)* double mutant, which produces largely  
445 tumorous germlines with only very few cells entering meiosis, which eventually revert  
446 back to the progenitor fate (Mohammad et al., 2018). The few “meiotic cells” were devoid  
447 of PPM-1.D but showed expression of HIM-3 and CHK-2-mediated phosphorylation of  
448 the pairing center proteins (pHIM-8/ZIMs, (Kim et al., 2015)) (Figure 5.D). We conclude  
449 that the progenitor fate goes in hand with PPM-1.D presence and the loss of PPM-1.D  
450 correlates well with active CHK-2, whereas the CHK-2 independent loading of HIM-3  
451 suggests that PPM-1.D regulates the activity of other targets.

452 We also examined the kinetics of chromosome alignment and pairing in the *ppm-1.D*  
453 mutants by FISH analysis using a probe for the 5S ribosomal RNA gene cluster.  
454 Pairing was delayed in both *ppm-1.D jf120* and *tm8369* when compared to the wild type  
455 (Figure 5.E), however by pachynema the extent of pairing was indistinguishable from  
456 the wild type. Both *ppm-1.D* mutant alleles accumulated higher amounts of the marker  
457 of the meiotic recombination RAD-51 (Alpi et al., 2003; Colaiacovo et al., 2003), and a  
458 delayed clearance during the meiotic time course, which indicates an impediment of  
459 recombination. RAD-51 foci nonetheless disappeared, which suggests successful repair  
460 (Figure 5.F). In summary, we propose that meiotic entry in wild type occurs following  
461 the completion of meiotic S-phase and that premature meiotic entry, prior to completion  
462 of meiotic S-phase interferes with the kinetics of chromosome pairing and meiotic  
463 recombination. Further, we propose that both catalytic and non-catalytic activities of  
464 PPM-1.D together prevent premature meiotic entry.

465

466 PPM-1.D is involved in the DNA damage response.

467 DNA damage can stochastically appear during the mitotic cell cycle, and when it  
468 occurs a signaling mechanism induces repair to prevent aberrant cell divisions

469 (Petsalaki and Zachos, 2020). In the *C. elegans* germline, DNA damage can occur in  
470 the progenitor zone caused by faulty mitotic replication or by random DNA insults, and  
471 after meiotic entry programmed DNA double strand breaks induced by the  
472 topoisomerase like enzyme SPO-11 (Dernburg et al., 1998). Persistent DNA damage  
473 will lead to an increased *cep-1/p53*-dependent apoptosis occurring at the end of  
474 pachynema (Gartner et al., 2008). We therefore set out to quantify apoptosis in the *ppm-*  
475 *1.D* mutants using SYTO12 as a reporter (Adamo et al., 2012). In comparison to the  
476 wild type, both *ppm-1.D* truncation (*tm8369*) and null (*jf120*) alleles displayed a  
477 significant increase in apoptotic corpses, indicating the presence of aberrant  
478 recombination intermediates (Figure 6.A). Deletion of *spo-11* in both *ppm-1.D* alleles  
479 failed to reduce the number of apoptotic corpses to wild type levels (Figure 6.A). Only  
480 the elimination of *cep-1/p53* in the *ppm-1.D* alleles led to the reduction of apoptosis to  
481 wild-type levels, supporting the view that *ppm-1.D* mutants accumulate both meiotic and  
482 *spo-11* independent DNA damage.

483 DNA damage could also arise in the mitotic germline compartment. We further  
484 challenged the DNA response in the progenitor zone by exposing worms to  $\gamma$ -irradiation  
485 (75Gy) (Figure 6.B) (Gartner et al., 2004b). In wild type, a response to DNA damage in  
486 this compartment leads to the enlargement of the nuclear diameter (Gartner et al.,  
487 2004a), which we measured 8 and 25 hours after  $\gamma$ -irradiation. Whereas in wild type  
488 after 8 hours,  $70 \pm 17\%$  (average  $\pm$  SD) of nuclei were responding to the challenge  
489 (nucleus diameter over  $3.75 \mu\text{m}$ ), both *ppm-1.D* alleles displayed a significantly slower  
490 activation (*ppm-1.D(tm8369)*  $40 \pm 21\%$ , *ppm-1.D(jf120)*  $38 \pm 31\%$ , average  $\pm$  SD, Figure  
491 6.B). We therefore concluded that PPM-1.D is promoting mitotic cell cycle DNA damage  
492 response. Further, we quantified mitotic M-phase arrest 25 h post  $\gamma$ -irradiation, which  
493 becomes evident as a nuclear diameter over  $6 \mu\text{m}$ . Both *ppm-1.D* alleles lacked any  
494 significant increase in M-phase arrest compared to wild type and we conclude that PPM-  
495 1.D was not promoting mitotic arrest. At this timepoint, *ppm-1.D* mutants still displayed  
496 a significantly increased number of enlarged nuclei (with a diameter over  $3.75 \mu\text{m}$ ): *ppm-*  
497 *1.D(tm8369)*  $39 \pm 8\%$ , *ppm-1.D(jf120)*  $39 \pm 11\%$ , average  $\pm$  SD compared to the wild  
498 type  $24 \pm 9\%$ , average  $\pm$  SD (Figure 6.B). This might suggest that PPM-1.D is involved  
499 in DNA damage signaling either in induction and/or downregulation.

500 We also challenged progenitor zone cells by the depletion of nucleotides, which  
501 blocks DNA replication (Timson, 1975). After hydroxy urea (HU) exposure we measured  
502 embryonic lethality in wild type and *ppm-1.D* mutants. We focused on the lethality 3

503 days after the HU exposure, when exposed meiocytes were in the progenitor zone and  
504 early meiotic prophase. Both *ppm-1.D* alleles *tm8369* and *jf120*, displayed significantly  
505 increased lethality relative to the wild type (Figure 6.C). The *ppm-1.D* null allele led to a  
506 more severe embryonic lethality (day 3, Figure 6.C) than the C-terminal truncation allele,  
507 which is still expressed and contains a functional PP2C domain. As the catalytically  
508 inactive allele was as much affected as the null allele (Figure 6.C), we conclude that the  
509 lack of phosphatase activity was responsible for the increased lethality. Moreover, this  
510 implies that the phosphatase activity of the truncated allele is sufficient to partially  
511 rescue the stress induced by the replication block upon HU addition. Altogether our  
512 results show that, as in mammals, PPM-1.D is involved in the mitotic cell cycle response  
513 to DNA damage and to replication stress.

## 514 Discussion

515 PPM-1D is a PP2C phosphatase and we isolated a recessive loss of function  
516 *ppm-1.D* allele in a screen aimed at suppressing the meiotic entry defects in the *prom-*  
517 *1* mutant. We found that like the mammalian protein (Shaltiel et al., 2015), PPM-1.D has  
518 the well-established canonical role in the DNA damage response. Importantly, we  
519 identified a novel function for PPM-1.D as a prominent factor involved in the transition  
520 from the progenitor cell fate to differentiation at meiotic entry. PPM-1.D is expressed in  
521 the germline progenitor zone cells and our data suggest that it is actively degraded by  
522 SCF<sup>PROM-1</sup> at meiotic entry; indeed it seems a major target as evidenced by restoration  
523 of high levels of embryonic viability when suppressing *prom-1* defects. Our mass  
524 spectrometry data identified CHK-2 as the main interacting partner of PPM-1.D and we  
525 showed that the two proteins interact through the C-terminal domain of PPM-1.D.  
526 Moreover, we found that the C-terminal domain of PPM-1.D sequesters CHK-2 at the  
527 nuclear rim, promoting CHK-2 inactivation. Premature meiotic entry in *ppm-1.D* mutants  
528 leads to low levels of embryonic death, elevates rates of apoptosis, meiotic entry prior  
529 to completion of meiotic S-phase, the uncoupling of certain meiotic events (e.g. meiotic  
530 chromosome axes formation and chromosome end mobilization) and delayed  
531 chromosome pairing, which goes in hand with altered kinetics of meiotic recombination.  
532 *ppm-1.D* hermaphrodites sire progeny with developmental defects at a low rate, which  
533 could be explained by erroneous DNA repair taking place with a defective DNA damage  
534 response, but also if meiotic DSBs are induced prior to the completion of DNA  
535 replication.

536



## 537 Control of meiotic entry in *C. elegans*

538 We propose the following model for meiotic entry in *C. elegans* (Figure 7). In the  
539 progenitor zone germ cells, PPM-1.D enters the nucleus, where it directly interacts with  
540 CHK-2 and sequesters CHK-2 to the nuclear periphery. This sequestration of CHK-2 at  
541 the nuclear rim depends on the C-terminal part of PPM-1.D protein and does not require  
542 its phosphatase activity. The rim co-localization represents the first layer of control of  
543 PPM-1.D over CHK-2. Interestingly, when we engineered a mutant lacking both the C-  
544 terminus and the catalytic activity (leaving the rest of the protein intact), we found a more  
545 pronounced premature meiotic entry than in the single mutants. We propose that both  
546 PPM-1.D mediated sequestration and phosphatase activity inhibit CHK-2 in the  
547 progenitor zone, although the sequestration maybe the predominant inhibitory  
548 mechanism. Meiotic entry is initiated via the programmed degradation of PPM-1.D. This  
549 scheduled degradation mediated by the SCF<sup>PROM-1</sup> complex leads to the release of  
550 CHK-2 from the nuclear periphery which allows CHK-2 to successfully drive important  
551 processes during meiosis. CHK-2 antagonizing PPM-1.D activity appears to depend on  
552 its concentration. The amount of nuclear PPM-1.D may act like a toggle switch of CHK-  
553 2 activity, as suggested in *prom-1* mutant rescued by *npp-9* RNAi; here, only the nuclear  
554 amount of PPM-1.D was decreased, but CHK-2 remained nuclear periphery associated  
555 to a certain extent, however sufficient active CHK-2 was generated to rescue *prom-1*.

556

## 557 Dual function of PPM-1.D at meiotic entry

558 The PP2C phosphatase PPM-1.D first sequesters the meiotic key regulator CHK-  
559 2 (noncatalytic function) and second its phosphatase activity is involved in inactivating  
560 meiotic entry relevant targets (catalytic function), where CHK-2 could be one of several  
561 targets. The function of enzymes is not always restricted to their catalytic activity. For  
562 example, mammalian histone modifiers also exhibit noncatalytic roles involved in non-  
563 canonical processes like promoting cancer cell proliferation (Aubert et al., 2019),  
564 suggesting that enzymes having both noncatalytic and catalytic roles are potentially  
565 more common than expected. Similarly, there is growing evidence that phosphatases  
566 can lose their catalytic activity and gain non-catalytic activities through evolution  
567 (Reiterer et al., 2020). Such pseudo-phosphatases are involved in processes ranging  
568 from competition to substrate binding to spatial anchoring of binding partners. In the  
569 outlined scenario of meiotic entry PPM-1.D did not lose its phosphatase activity but

570 exerts most of its control on CHK-2 via spatial sequestration of CHK-2 at the nuclear  
571 periphery, thus preventing premature meiotic entry.

572

### 573 Regulation of CHK-2 by PPM-1.D and other potential targets

574 CHK-2 appears to be negatively regulated by PPM-1.D, however, there may be  
575 additional layers of regulation of CHK-2 in the progenitor zone. Indeed in *ppm-1.D*  
576 mutants, inappropriate activation of CHK-2 indicated by the premature appearance of  
577 SUN-1(S8Pi) is only confined to a couple of cell rows prior to meiotic entry and not to  
578 the entire progenitor zone. This could either mean that CHK-2 activation is regulated  
579 independently of PPM-1.D in the more distal region of the progenitor zone or that CHK-  
580 2 requires an activation step in addition to loss of inhibition by PPM-1.D. Moreover CHK-  
581 2 is potentially not the only target of the phosphatase PPM-1.D since the *prom-1*  
582 phenotype is more severe than the *chk-2* phenotype. *prom-1* mutants display defective  
583 cohesion and chromosome axes protein loading, which is not evident in *chk-2* mutants.  
584 PROM-1 has also been shown to function in the degradation of mitotic cell cycle proteins  
585 at meiotic entry (Mohammad et al., 2018). However, this function is not mediated by  
586 PPM-1.D (A. Mohammad, unpublished observations). Nevertheless, PPM-1.D is likely  
587 to function in the regulation of other meiotic proteins. We have observed similar defects  
588 in chromosome axes morphogenesis in *atr-1* (the worm ATL homolog) mutants (data  
589 not shown) thus PPM-1.D may also regulate the ATL-1 kinase at this important  
590 transition. Interestingly the uncoupling of chromosome axes loading and SUN-1  
591 phospho-modification is less prominent in the *tm8369* truncation allele, which retains  
592 the catalytic activity of PPM-1.D. This could be a hint that the chromosome axes  
593 morphogenesis is predominantly under the control of the dephosphorylation activity of  
594 PPM-1.D.

595

### 596 Conservation of the DNA damage response

597 In mammals, PPM1D/Wip1 is involved in the DNA damage response, the  
598 apoptotic response (Goloudina et al., 2016) and the protein is often overexpressed in  
599 cancer (Pechackova et al., 2017). In *C. elegans*, PPM-1.D is also involved in the  
600 response to DNA damage. Since PPM-1.D is also detected in the embryos (Figure 2.D  
601 - see embryo next to the progenitor zone tip), it would be very interesting to investigate  
602 its involvement in the regulation of the DNA damage response during developmental  
603 processes.

604           Upregulation of PPM1D/Wip1 expression in many human cancers makes the  
605 protein and attractive potential target for cancer therapy (Pechackova et al., 2017). It  
606 would be very interesting to determine whether the human homolog of PROM-1,  
607 FBXO47, specifically degrades PPM1D/Wip1. Renal carcinoma samples were identified  
608 with deletions in FBXO47 (Simon-Kayser et al., 2005), thus it would be highly interesting  
609 whether PPM-1.D/Wip1 qualifies as a target for FBXO47 as well and whether germline  
610 tumors are associated with mutations in FBXO47 in humans.

611

612



## 613 Acknowledgments

614 We thank Stefan Schuechner, Marie Therese Kurzbauer, Luisa Cochella, Dea Slade,  
615 Anne Villeneuve, Nicola Silva, Monica Colaiacovo and Monique Zetka for sharing  
616 reagents, Egon Ogris and the Jantsch lab for fruitful discussions. We are indebted to  
617 Dieter Spittersberger and Angela Graf for their outstanding technical support and  
618 Nicolas Garcia-Seyda for strain construction. We are very thankful to Josef Gotzmann  
619 and Thomas Peterbauer for the state-of-the-art Microscopy Facility and valuable  
620 feedback. Some strains were provided by the CGC, which is funded by NIH Office of  
621 Research Infrastructure Programs (P40 OD010440). Electron microscopy was  
622 performed by the EM Facility of the Vienna Biocenter Core Facilities GmbH (VBCF),  
623 member of Vienna Biocenter (VBC), Austria. Mass spectrometry analysis was  
624 performed by the Mass spectrometry Facility of the Max Perutz Labs.

625 This project was funded by the Austrian Research Fund (FWF) project no. P 31275-B28  
626 to V.J. T.S is supported by the National Institutes of Health grant R01 GM-100756. Y.K.  
627 is supported by the National Institutes of Health grant R35GM124895.

628

629

630 **Author Contributions**

631  
632 A.B., D.P., A.M., J.B. conducted and analyzed cell biology experiments;  
633 A.B. performed the biochemistry and yeast analysis.  
634 M.H. performed the mass spectrometry analysis.  
635 R.L., S.F. performed the *E.coli* expression and purification.  
636 A.B., D.P., J.B. constructed the worm strains;  
637 A.B., D.P., A.M., S.F., T.S., Y.K. and V.J. conceived the project and analyzed data.  
638 A.B., T.S and V.J. wrote the manuscript.

639

640

641 **Declaration of Interests**

642 The authors declare no competing interests.

643

644

645 Figure titles and legends

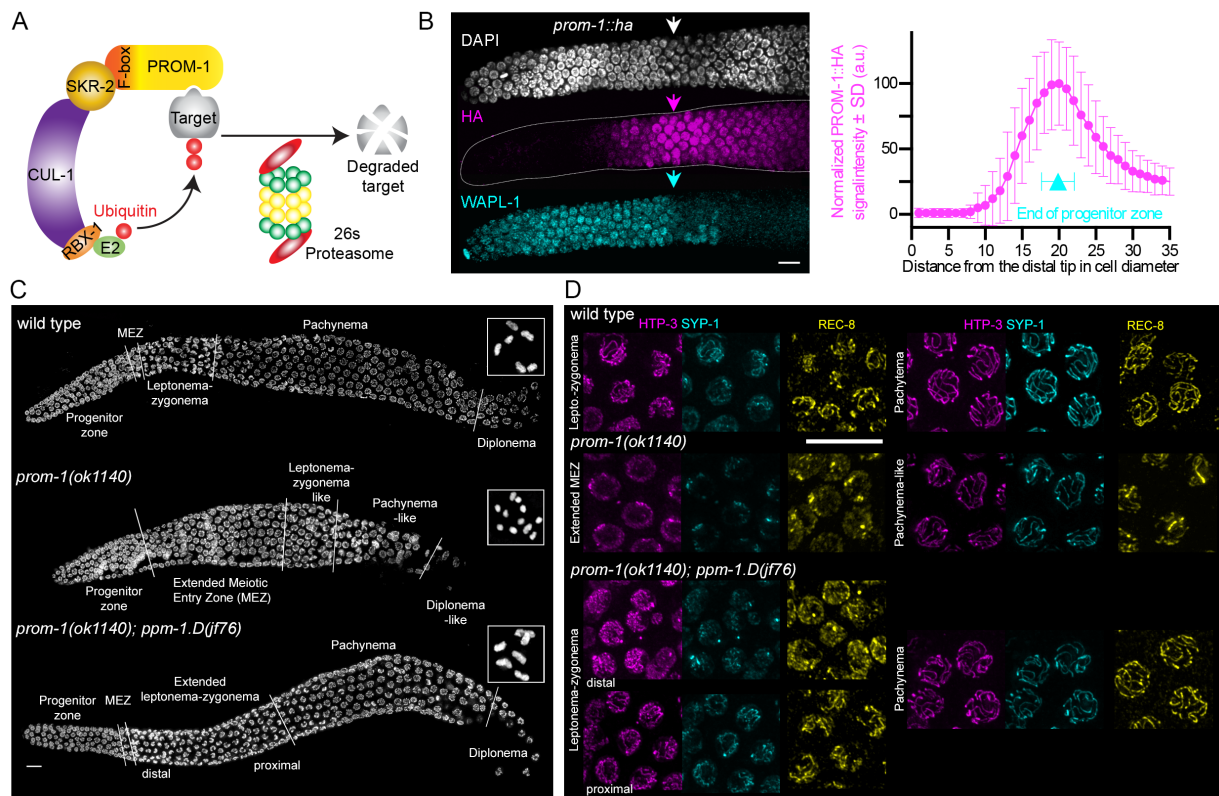

646  
 647 **Figure 1. Loss of SCF<sup>PROM-1</sup> activity at meiotic entry is rescued by mutating *ppm-***  
 648 ***1.D.*** **A.** Schematics of the SCF<sup>PROM-1</sup> complex. **B.** Left, Immunodetection of WAPL-1  
 649 (cyan) and PROM-1::HA (magenta) in the progenitor zone, at the distal end of the *C.*  
 650 *elegans* germline. Arrows marks the entry into meiosis, which occurs at the leptone-  
 651 ma-zygonema stage. Scale bar: 5  $\mu$ m. Right, normalized levels of PROM-1::HA (magenta)  
 652 throughout the progenitor cell zone, measured along the distance from the distal tip in  
 653 cell diameter; the end of the progenitor zone (cyan) is marked. Error bars: SD. **C.**  
 654 Gonads displaying prophase I for the mentioned genotypes. Scale bar: 10  $\mu$ m. Boxed  
 655 insets show representative diakinesis chromosomes. **D.** Insets showing staining for  
 656 HTP-3 (magenta), SYP-1 (cyan), REC-8 (yellow) for the depicted zones. Scale bar: 10  
 657  $\mu$ m.  
 658

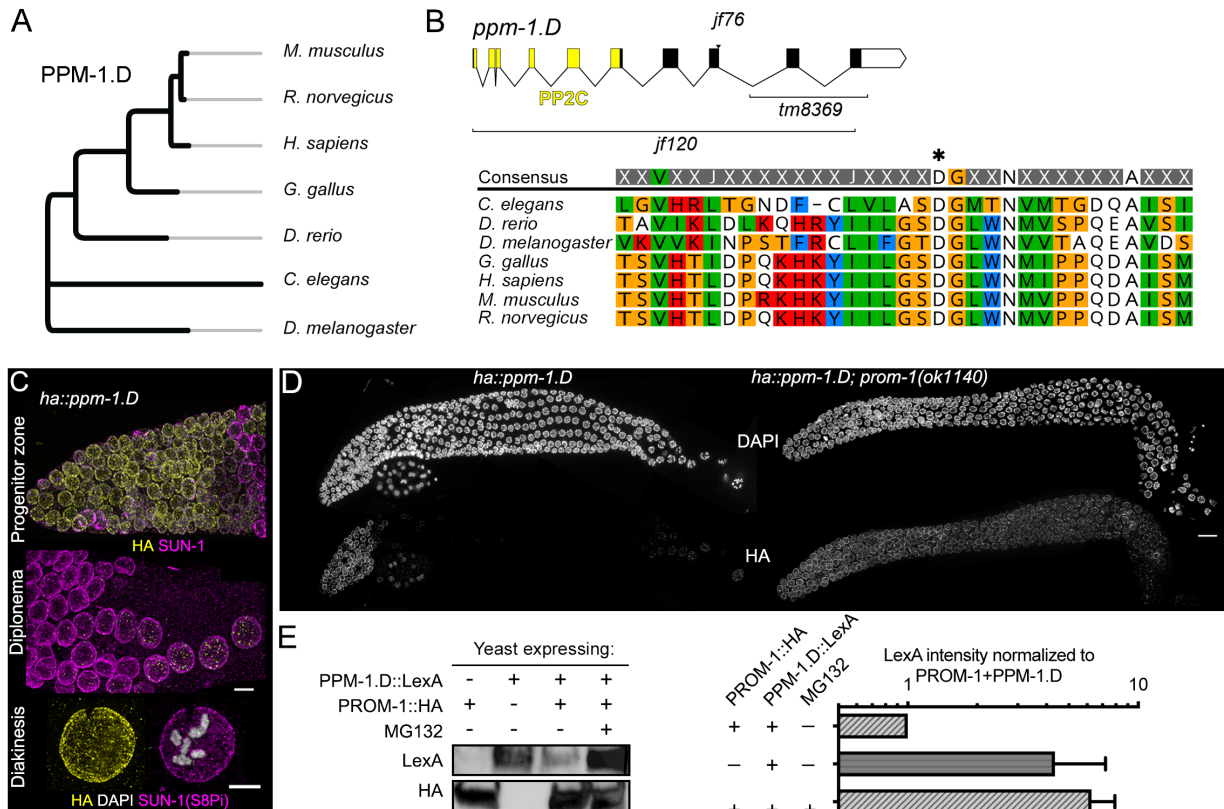

659

660

661 **Figure 2. PPM-1.D is a conserved PP2C phosphatase and expression is controlled**  
 662 **by SCF<sup>PROM-1</sup>. A.** Phylogenetic tree of PPM-1.D. **B.** Gene structure of *ppm-1.D* with  
 663 domains, exons/introns and alleles depicted (top), and alignment of PPM-1.D protein  
 664 sequences (bottom) (amino acid range: 498 – 530) for the mentioned organisms  
 665 highlighting the conservation of the PP2C domain. Asterisk marks the conserved  
 666 aspartic acid necessary for phosphatase activity. **C.** Immuno-detection of PPM-1.D::HA  
 667 (yellow) and SUN-1 (magenta) in the progenitor zone (top), diplonema (middle) and  
 668 diakinesis (bottom). Scale bar: 5  $\mu$ m. **D.** Dissected gonads stained for DAPI (top) and  
 669 PPM-1.D::HA in wild type (left) and *prom-1* mutants (right). Scale bar: 10  $\mu$ m. **E.** Left,  
 670 Western blot with TCA precipitated proteins from yeast expressing PPM-1.D::LexA,  
 671 PROM-1::HA in absence or presence of the proteasome inhibitor. Right, quantification  
 672 of PPM-1.D::LexA in the western blots (n=2) normalized to the level of PPM-1.D::LexA  
 673 when both PROM-1 and PPM-1.D are expressed.

674

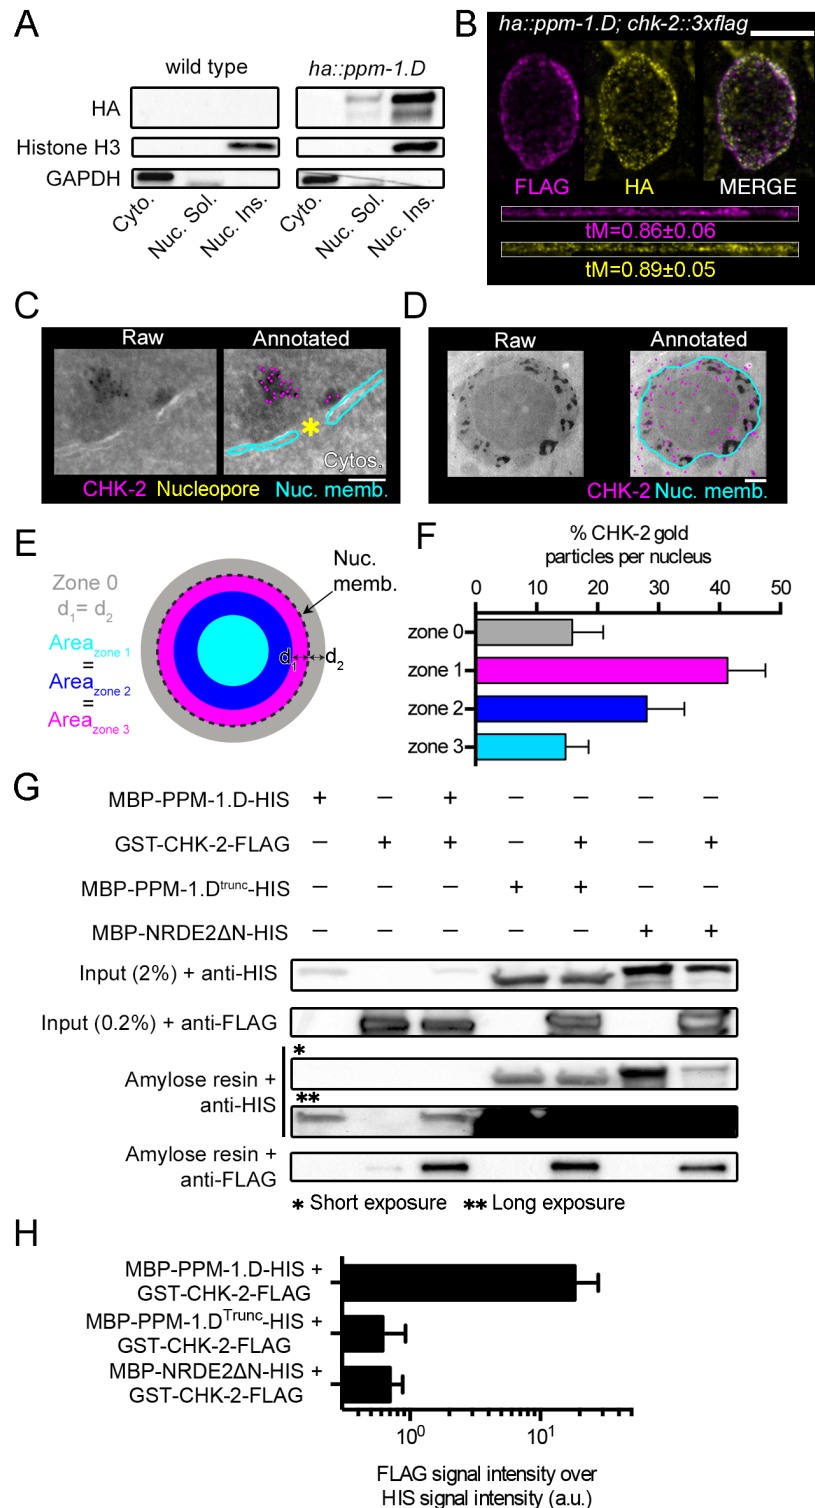

675

676

677 **Figure 3. PPM-1.D and CHK-2 co-localize in the progenitor zone and interact**  
 678 **physically. A.** Western blot of cellular fractions (cytosolic, nuclear soluble and nuclear  
 679 insoluble) with the specified antibodies for the indicated genotypes. **B.** STED visualized  
 680 immuno-staining of CHK-2::3xFLAG (magenta) and PPM-1.D::HA (yellow) (top);  
 681 straightened profiles of the signals (bottom). tM: automatic threshold Manders

682 colocalization coefficient. Scale bar: 5  $\mu$ m. **C.** Left, raw electron microscope image of  
683 one nucleopore with gold particles detecting CHK-2 and right with annotated nuclear  
684 membranes (cyan); CHK-2 (magenta). Scale bar: 10 nm. **D.** Left, raw electron  
685 microscope image of one mitotic nucleus with gold particles detecting CHK-2 and right  
686 with CHK-2 (magenta) and the nuclear membranes (cyan). Scale bar: 100 nm. **E.**  
687 Scheme used to divide the nucleus in 3 zones of equal area (zones 1, 2, and 3) and the  
688 outer vicinity of the nucleus (zone 0). **F.** Distribution of the CHK-2 gold particles in the  
689 different zones. **G.** Top, Western blot analysis after amylose purification for the indicated  
690 proteins expressed in *E. coli*. Bottom, quantification of the FLAG signal (CHK-2)  
691 normalized by the HIS signal for the mentioned co-lysed samples (n=2 Western blots).  
692



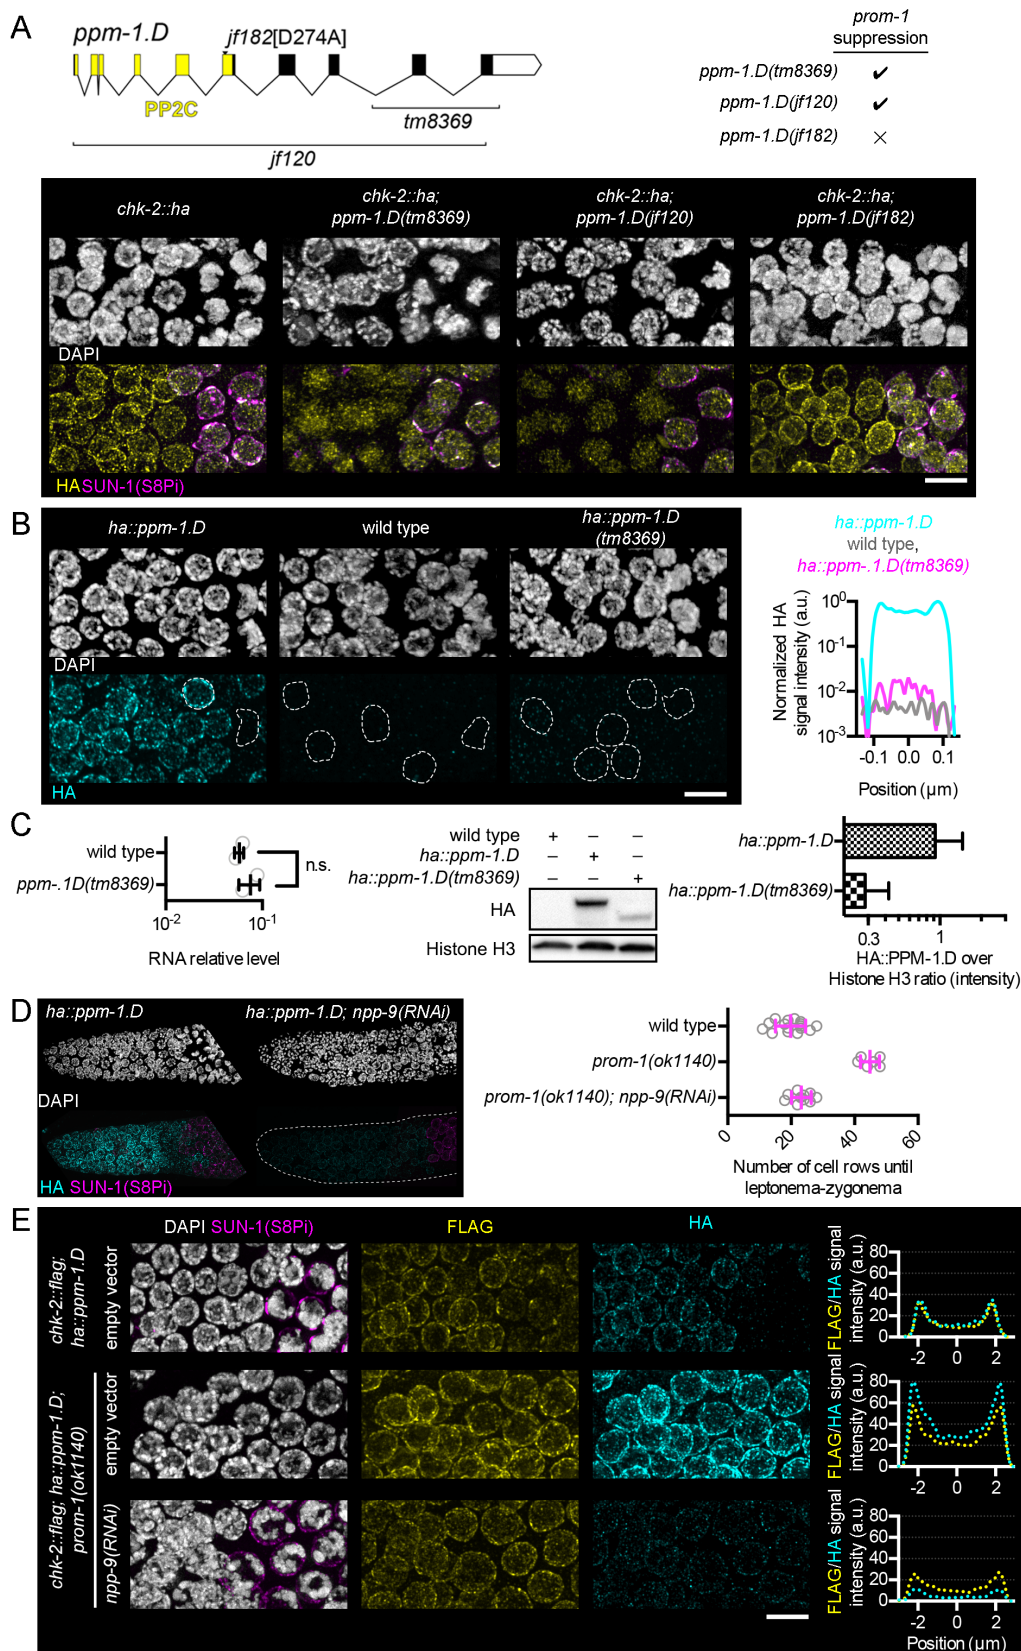

693

694

695 **Figure 4. Regulation of CHK-2 localization and activity by PPM-1.D.** A. Gene  
 696 structure of *ppm-1.D* with domain, exon/intron structure and alleles (top, left), and  
 697 genotypes suppressing *prom-1* phenotype. DAPI staining (white) and immuno-staining

698 of HA (yellow) in the progenitor zone, for the indicated genotypes. *jf182* [D274A] allele  
699 is catalytic inactive PPM-1.D. Scale bar: 5  $\mu$ m. **B.** DAPI staining and immuno-detection  
700 of HA (cyan) in the progenitor zone, for the indicated genotypes. Scale bar: 5  $\mu$ m. Right,  
701 average line profile analysis of HA signal intensity centered on the nucleus for the  
702 mentioned genotypes (n=25 nuclei from the progenitor zone). **C.** Left, RNA  
703 quantification for *ppm-1.D*, for the indicated genotypes. Data for wild type is the same  
704 as in Figure S2.A. Center, western blot from whole worm extract for HA and the histone  
705 H3, for the indicated genotypes. Right, quantification of the ratio HA over histone H3  
706 intensity, for the indicated genotypes. **D.** Left, DAPI staining and immuno-staining of  
707 PPM-1.D::HA (cyan) and SUN-1(S8Pi) (magenta) in the distal tip, for the indicated  
708 genotypes. Right, number of cell rows until entry into meiotic prophase, for the indicated  
709 genotypes. **E.** DAPI staining and immuno-detection of SUN-1(S8Pi) (magenta), FLAG  
710 (yellow) and HA (cyan) at the transition from progenitor zone to entry into leptonema-  
711 zygonema (centered at around 20 cell rows from the distal tip cell), for the indicated  
712 genotypes. Scale bar: 5  $\mu$ m. Right, average line profile analysis of HA signal intensity  
713 centered on the nucleus, for the indicated genotypes (n=25 nuclei from the mitotic zone).  
714



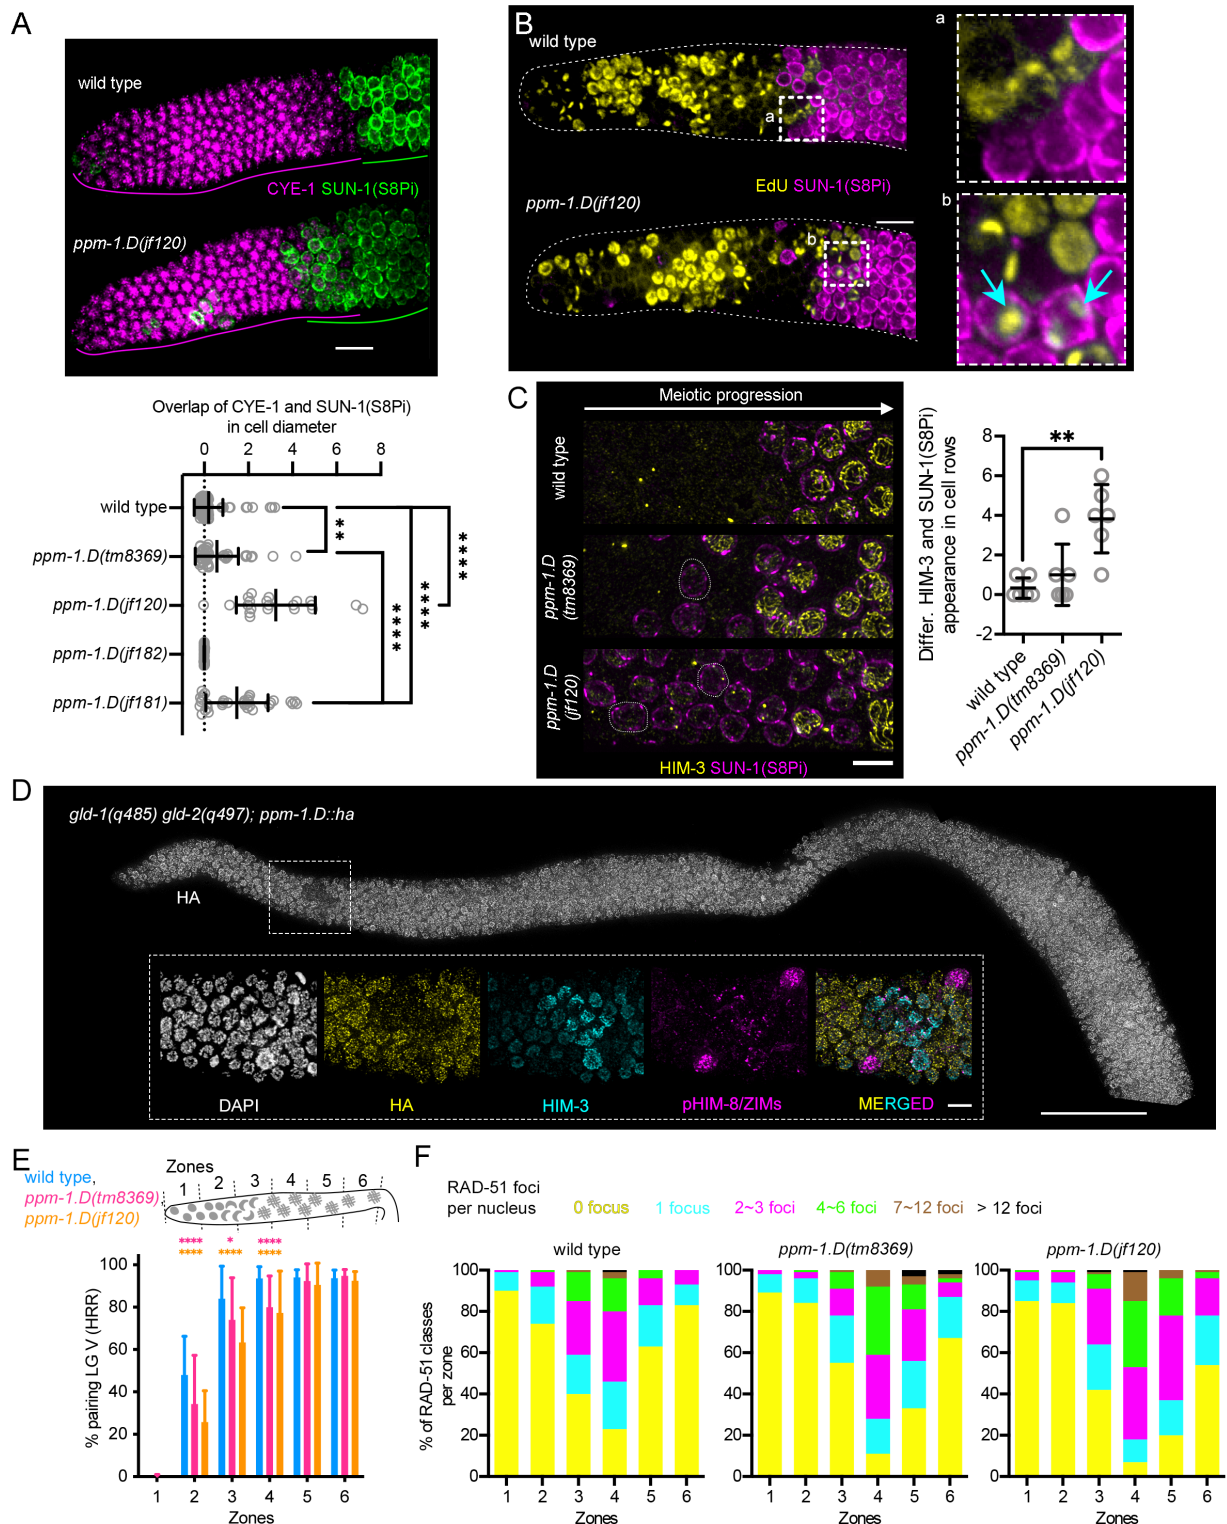

715

716

717 **Figure 5. Premature meiotic entry in *ppm-1.D* mutants.** **A.** Top, immuno-staining of  
 718 CYE-1 (magenta) and SUN-1(S8Pi) (green) in the progenitor zone for the indicated  
 719 genotypes. Scale bar: 10  $\mu$ m. Bottom, distribution of the overlap between CYE-1 and  
 720 SUN-1(S8Pi) staining in cell diameter, for the genotypes shown. \*\*, P value <0.01, \*\*\*\*,  
 721 P value <0.0001 for the Mann-Whitney test. **B.** Staining of EdU incorporation into

722 replicating DNA (yellow) and SUN-1(S8Pi), for the indicated genotypes. Blue arrows in  
723 inset highlight nuclei with significant EdU incorporation, indicating ongoing meiotic S-  
724 phase, and staining for SUN-1(S8Pi), indicating CHK-2 activity and meiotic entry. Scale  
725 bar: 10  $\mu$ m. **C.** Left, DAPI staining and immuno-staining of HIM-3 (yellow) and SUN-  
726 1(S8Pi) (magenta). Scale bar: 5  $\mu$ m. Right, difference between the number of cell row  
727 at which HIM-3 and SUN-1 appears in the germline for the indicated genotypes. Cell  
728 rows were counted as positive when more than half of the cells were positive for the  
729 staining. **D.** Top, immuno-staining of HA in *gld-1(q485) gld-2(q497); ppm-1.D::ha* mutant  
730 worms. Scale bar: 50  $\mu$ m. Insets show magnifications of nuclei stained for DAPI (white),  
731 HA (yellow), HIM-3 (cyan) and pHIM-8/ZIMs (magenta) in the zone highlighted in the  
732 top picture. Scale bar: 5  $\mu$ m. **E.** Dissected gonads were divided into six zones of equal  
733 length. Percentage of nuclei with paired FISH signal; 5S probes on chromosome V in  
734 each zone, for the indicated genotypes. \*, P value <0.05, \*\*\*\*, P value <0.0001 for the  
735 Fisher's exact test. **F.** Percentage of nuclei with given number of RAD-51 foci in each  
736 zone, for the indicated genotypes. P values for the Fisher's exact test are in Table S3.  
737

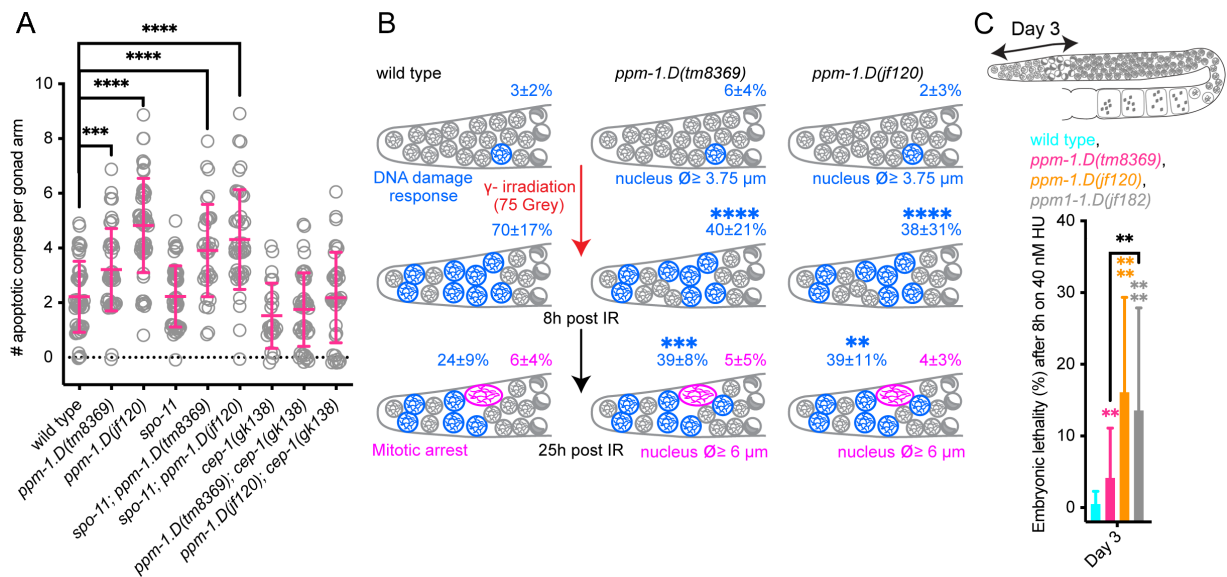

738

739

740 **Figure 6. PPM-1.D functions in the DNA damage response.** **A.** Quantification of  
 741 apoptotic corpses (scatter and mean ± SD) for the indicated genotypes. \*\*\*, P value  
 742 <0.001, \*\*\*\*, P value <0.0001 for the Mann-Whitney test. **B.** Percentage of nuclei with  
 743 diameter above 3.75 μm before, 8 and 25 hours after γ-irradiation (75 Grey), for the  
 744 indicated genotypes. \*\*, P value <0.01, \*\*\*, P value <0.001, \*\*\*\*, P value <0.0001 for  
 745 the Fisher's exact test. **C.** Embryonic lethality after 8 hours on 40 nM hydroxy urea (HU)  
 746 three days after the stress, for the indicated genotypes. Data for wild type, *ppm-*  
 747 *1.D(jf120)* and *ppm-1.D(jf182)* are the same as in Figure S5. The schematics of the *C.*  
 748 *elegans* gonads (top) indicates the position of the nuclei in the germline at the time of  
 749 exposure to irradiation. \*\*, P value <0.01, \*\*\*\*, P value <0.0001 for the T test.

750

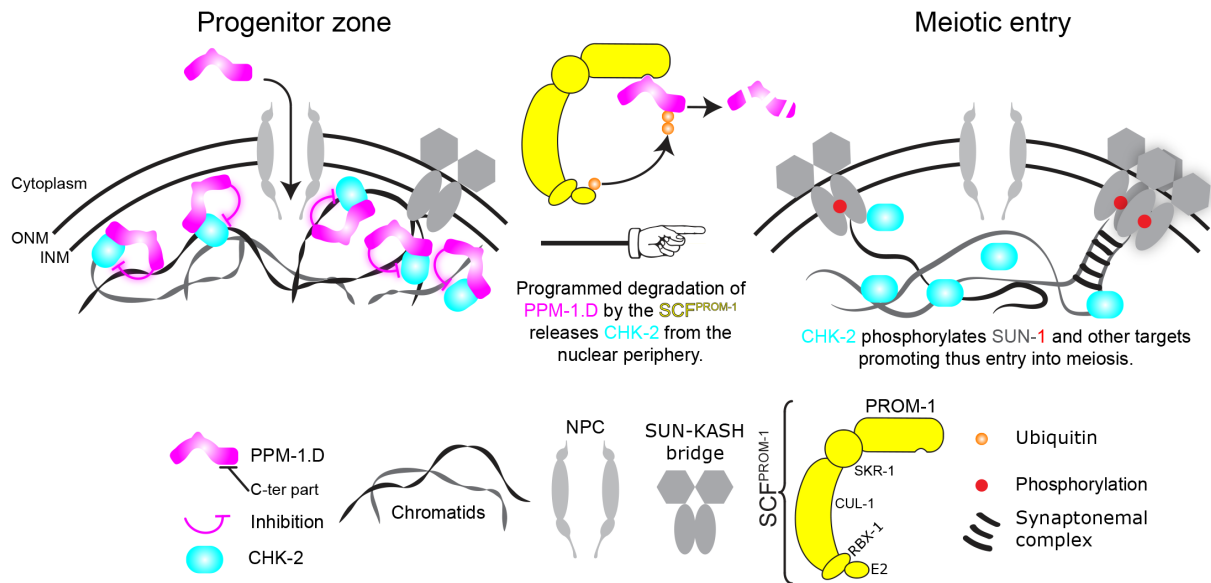

751

752

753

754 **Figure 7. Model of control of meiotic entry by PPM-1.D.** Entry of PPM-1.D into the  
 755 nucleus is mediated by the nucleopores in the progenitor zone. Inside the nucleus PPM-  
 756 1.D interacts directly with CHK-2 via its caboxy terminus and inhibits CHK-2 by  
 757 sequestering it at the nuclear periphery and dephosphorylation. At meiotic entry,  
 758 SCF<sup>PROM-1</sup> degrades PPM-1.D. After the scheduled degradation of PPM-1.D, CHK-2  
 759 becomes released from the nuclear periphery, and gains access to its substrates and  
 thus launches initial events of meiotic prophase.

760

## 761 METHODS DETAILS

### 762 Nematode strains, strain construction, and culture conditions

763 All strains listed are derivatives of N2 Bristol and were cultivated under normal  
764 conditions (Brenner, 1974). Worms were  $\gamma$ -irradiated 24 hours post L4 stage with a dose  
765 of 75 Gy using a  $^{137}\text{Cs}$  source. CRISPR editing was done as described in (Paix et al.,  
766 2015) to the exception of *prom-1::ha* which was generated as described in (Norris et al.,  
767 2015). Guide and repair template as well as genotyping primers are listed in  
768 Supplemental Table S4.

769

### 770 EMS screen

771 *prom-1(ok1140) unc-55(e402)* were grown on *E. coli* seeded plates for 5 days. On day  
772 6, worms were collected in M9 buffer (0.3%  $\text{KH}_2\text{PO}_4$ , 0.6%  $\text{Na}_2\text{HPO}_4$ , 0.5%  $\text{NaCl}$ , and  
773 1 mM  $\text{MgSO}_4$ ) and washed 3 times in M9 buffer to clean the worms from *E. coli*.  
774 Mutagenesis was carried out in 50 mM ethyl methane sulfonate (EMS). After  
775 mutagenesis, worms were allowed to recover until day 10 and then they were bleached  
776 to synchronize the population. L4 hermaphrodites were singled to small agarose plates  
777 seeded with *E. coli*. The viability of the mutagenized worms was assayed by looking for  
778 plates overcrowded in the second generation (F1+F2, Figure S1.A).

779

### 780 Cytological preparation of gonads and immunostaining

781 Immunofluorescence was performed as previously described (Martinez-Perez and  
782 Villeneuve, 2005). L4 hermaphrodites were incubated at 20°C for 24 h. Gonads were  
783 then dissected from young adults into 1× PBS, fixed in 1% formaldehyde for 5 min at  
784 room temperature and frozen in liquid nitrogen. After post-fixation in ice-cold methanol,  
785 non-specific binding sites were blocked by incubation in PBS containing 1% BSA for at  
786 least one hour. Antibodies were diluted in 1x PBST (1x PBS, 0.1% Tween-20) and  
787 incubated overnight at 4°C (for primary antibodies) or 2 h at room temperature (for  
788 secondary antibodies). After washes in PBST, samples were mounted in Vectashield  
789 anti-fade (Vector Laboratories Inc., Burlingame, CA) containing 2 mg/ml 496-diamidino-  
790 2-phenylindole (DAPI).

791 For visualization of pHIM-8/ZIMs and HIM-3 (Figure 5.D) hermaphrodite  
792 germlines were dissected from 24 h post-L4 adults in egg buffer (25 mM Hepes, pH 7.4,  
793 118 mM  $\text{NaCl}$ , 48 mM  $\text{KCl}$ , 2 mM  $\text{EDTA}$ , 5 mM  $\text{EGTA}$ , 0.1% Tween-20, and 15 mM

794 NaN<sub>3</sub>) and fixed in 1% formaldehyde for 1 min before freezing in liquid nitrogen.  
795 Dissected germlines were further fixed in methanol at -20°C for 1 min and rehydrated  
796 with PBS with 0.1% Tween-20. Samples were then blocked with blocking reagent for 1  
797 h and incubated with primary antibodies overnight at 4°C.

798  
799 **RNA interference**  
800 RNAi was done as described in (Jantsch et al., 2004). Briefly, a single colony from the  
801 *npp-9* clone and the empty vector (Ahringer collection (Kamath et al., 2001)) were grown  
802 over-night at 37°C in 2xTY media supplemented with ampicillin (100 µg.ml<sup>-1</sup>). Next day  
803 cells were pelleted at 3,500 rpm for 15 min, resuspended in 2xTY and 150 µl of the  
804 suspension was used to seed NGM plates containing 1 M IPTG and 100 ngml<sup>-1</sup>  
805 <sup>1</sup>ampicillin. Bacterial growth was allowed at 37°C overnight. Pre-picked L4 were added  
806 to the plates and left at 20°C for 48h before analysis.

### 807 808 RNA extraction and qPCR

809 Adult worms from 3 medium NGM plates were collected in M9 and allowed to sink in  
810 1.5 ml Eppendorf tubes on ice. The supernatant was removed and 250 µl of Trizol was  
811 added and then the suspension was transferred to another 1.5 ml Eppendorf tube  
812 containing 150 µl of acid washed beads. Worms were broken open using a Fast Prep  
813 instrument (3 cycles: 15 s at 5,000g, 600 s rest). Mixture of broken worms was  
814 transferred into a new 1.5 ml Eppendorf tube. After addition of 50 µl of chloroform,  
815 samples were vortexed for 30 s and left at room temperature for 5 min. Next, samples  
816 were centrifuged at 12,000 rpm for 15 min at 4°C. The clear top layer was transferred  
817 into a fresh 1.5 ml Eppendorf tube and nucleic acids were precipitated by addition of  
818 125 µl of isopropanol. Samples were spun down at 12,000 rpm for 10 min at 4°C. The  
819 pellet was washed with 500 µl of 70% ethanol and spun down at 14,000 rpm for 5 min  
820 at 4°C. The pellet was air dried and dissolved in 10 µl of RNase-free water. After DNase  
821 treatment using Promega kit following the provider instruction, cDNA synthesis was  
822 done using Superscript III with random hexamers as described in the kit. For the qPCR  
823 mastermix 100 ng of total RNA was used using the SensiFAST™ SYBR® No-ROX Kit  
824 and we used a Eppendorf Realplex 2 Mastercycler to read the plate. Ct measures were  
825 done in triplicate in the qPCR machine and these results were duplicated. *pmp-3* was  
826 used as reference (Zhang et al., 2012) and specific primers located in the 5' and 3'  
827 region of *pmp-1.D* were used to assess the RNA level. Results were analyzed using the



828 delta-delta CT method (Schmittgen and Livak, 2008). Primers used are listed in  
829 supplemental Table S5.

830

### 831 Microscopy and evaluation

832 3D stacks of images were taken using either a DeltaVision or a DeltaVision Ultra High  
833 Resolution microscope equipped with 100x/1.40 oil immersion objective lenses and a  
834 complementary softWORx software package. Images acquired with the DeltaVision  
835 were deconvolved using the softWORx deconvolution algorithm. Maximum intensity  
836 projections of deconvolved images were generated using ImageJ after adjustments of  
837 the maximums and background subtraction using a rolling ball radius of 50 pixels.  
838 Where specified, images of gonads consist of multiple stitched images. This is  
839 necessary due to the size limitation of the field of view at high magnifications. Stitching  
840 of images to build up entire gonads was performed manually in Adobe Photoshop.  
841 Levels of stitched images were adjusted to each other in Adobe Photoshop to correct  
842 for auto-adjustment settings of the microscope.

843 Super resolution images were acquired as single frame with an Abberior  
844 Instruments STEDYCON using alpha Plan-Apochromat 100x/1.46 Oil DIC with 2  
845 avalanche photodiode detectors for dual-channel 2D STED (orange, dark red) with  
846 samples prepared as explained before except that samples were not mounted in DAPI  
847 but in Abberior mounting media.

848

### 849 Fluorescence in situ hybridization (FISH)

850 The FISH protocol is based on a published protocol (Silva et al., 2014). Dissected  
851 gonads were fixed in 4% paraformaldehyde in egg buffer for 2 min at room temperature  
852 and then stored in methanol at  $-20^{\circ}\text{C}$ . Slides were then incubated in methanol at room  
853 temperature for 20 min, followed by 1 min washes in 50% methanol and 1× SCCT and  
854 dehydration by sequential immersion in 70%, 90% and 100% ethanol (3 min each).  
855 Hybridization mixture containing 10.5  $\mu\text{l}$  FISH buffer (1 ml 20× SCCT, 5 ml formamide,  
856 1 g dextran sulphate, 4 ml H<sub>2</sub>O) and 2.5  $\mu\text{l}$  labeled probe was added to air-dried slides.  
857 The FISH probe for the 5S rDNA locus (chromosome V) was made by labeling 1  $\mu\text{g}$   
858 DNA with the DIG (Digoxigenin)-nick translation kit (Roche). After addition of EDTA, the  
859 probe was incubated at  $65^{\circ}\text{C}$  for 10 min. PCR-amplified 5S rDNA was used as probes  
860 the right end of chromosome V and was labeled by PCR with digoxigenin-11-dUTP.  
861 Slides were incubated at  $37^{\circ}\text{C}$  overnight in a humidified chamber and then washed twice

862 (20 min) at 37°C in 50% formamide, 2X SCCT and 1X 10% Tween. After three washes  
863 in 2X SCCT at room temperature, samples were blocked for 1 h in 2X SCCT containing  
864 1X BSA (w/v). Slides were then incubated in secondary anti-biotin antibody diluted in  
865 2X SCCT (1:500) for 2 h at room temperature, followed by three washes in 2X SCCT,  
866 and then stained with 1 ng/ml DAPI and mounted in Vectashield.

867

## 868 SYTO-12 Staining

869 Young adults (24 h post-L4 stage) were soaked in 33  $\mu$ M SYTO-12 in PBS for 2–3 h at  
870 20°C in the dark, transferred to unseeded NGM (nematode growth medium) plates for  
871 30–60 min and then mounted. SYTO-12 positive cells were scored within the germline  
872 using an epifluorescence microscope equipped with a 40x or 63x oil immersion objective  
873 lens.

874

## 875 Imaging and quantification of PROM-1 levels

876 Immunostaining was carried out as described (Mohammad et al., 2018). Briefly,  
877 synchronized 24-hr past L4, adult worms of the desired genotype are dissected in PBST  
878 (PBS with 0.1% Tween 20) with 0.2 mM levamisole to extrude the gonads. The gonads  
879 were fixed in 3% paraformaldehyde (PFA) solution for 10 min and then post-fixed in  
880 –20° chilled methanol for 10 min. After washing 3 x 10-min with PBST, they are blocked  
881 in 30% goat serum for 30 min at RT. The gonads are then incubated with the desired  
882 primary antibodies diluted in 30% goat serum at 4° overnight. Next day, after 3 x 10-min  
883 PBST washes, the gonads are further incubated with appropriate secondary antibodies,  
884 diluted in 30% goat serum, at 4° overnight. After three 10-min washes with PBST, the  
885 gonads were incubated with 0.1 g/ml DAPI in PBST for 30 min. After removal of excess  
886 liquid, the gonads were mixed with anti-fading agent (DABCO) and transferred to an  
887 agarose pad on a slide.

888 Quantification of PROM-1::HA was carried out similar to described (Chen et al.,  
889 2020), with some modifications. The dissected gonads were stained with primary  
890 antibodies against HA-tag, WAPL-1 and with DAPI. Hyperstack images are captured  
891 using a spinning disk confocal microscope (PerkinElmer-Cetus, Norwalk, CT). Exposure  
892 time for each channel were kept constant for an individual experiment. Two overlapping  
893 hyperstack images were captured to get a coverage of ~50 cd from the distal end of the  
894 gonad. The images were further processed in Fiji and DAPI stained nuclei were used to  
895 mark the cell diameters (cds). Starting at the distal end, cd-wise plot profile (intensity) is



896 extracted by using custom python script, for each gonad and are stored in text files. The  
897 intensity data was processed in R to visualize protein levels. Since PROM-1  
898 quantification was carried out using antibodies against HA-tagged PROM-1, staining in  
899 N2, which lacks the HA-tagged PROM-1, was used to remove non-specific signals.  
900 WAPL-1 was used for the estimation of the progenitor zone length. All the scripts related  
901 to image processing and data analysis can be found at github  
902 (<https://github.com/arizmohammad>).

903

## 904 Edu labelling

905 EdU labeling was carried out as described (Fox et al., 2011; Kocsisova et al., 2018;  
906 Mohammad et al., 2018). Briefly, synchronized 24-hr past L4 adult worms of the desired  
907 genotype were transferred to and fed on EdU-labeled plates for exactly 30 min before  
908 they were dissected and stained with the desired primary and secondary antibodies as  
909 described above. After overnight incubation with secondary antibodies, the gonads were  
910 given three 10-min washes with PBST, and then incubated with the EdU-detection  
911 reaction mix for 30 min at RT, using an EdU-labeling kit (Invitrogen). The gonads were  
912 given three 20-min washes with PBST to reduce background signal of EdU-labelling.  
913 The gonads were then incubated with DAPI and transferred to the slide as above.

914

## 915 PPM-1.D and CHK-2 bacterial expression and pull-downs

916 The cDNAs encoding *C. elegans* CHK-2 and PPM-1.D were cloned into homemade  
917 vectors (derivatives of pBR322) harboring kanamycin resistance resulting in GST-CHK-  
918 2-(3xFlag) and MBP-PPM1D-His10 fusion constructs. For protein production, the CHK-  
919 2 and PPM1d constructs were transformed into *E. coli* BL21(DE3) derivatives and cells  
920 were grown at 37°C in terrific broth medium supplemented with kanamycin. When the  
921 *E. coli* cultures reached an optical density at 600 nm (OD<sub>600</sub>) of 2, the temperature was  
922 reduced to 18°C, and after 1 hour, protein production was induced by the addition of 0.2  
923 mM IPTG for 12-16 h at 18°C over night. The next day, cells expressing CHK-2 or PPM-  
924 1.D were either harvested individually or to test the interaction between CHK-2 and  
925 PPM-1.D, CHK-2 and PPM-1.D expressing cultures were mixed 1:1 before harvesting  
926 by centrifugation. Cell pellets were resuspended in 2 ml lysis buffer (50 mM Sodium  
927 phosphate, 25 mM TRIS/HCl, 250 mM NaCl, 20 mM Imidazole, 10% (v/v) glycerol,  
928 0.05% (v/v) NP-40, 5 mM beta-mercaptoethanol pH 7.5) per g wet cell mass. Cells were  
929 lysed by ultrasonic disintegration, and insoluble material was removed by centrifugation

930 at 21,000xg for 10 min at 4°C. For MBP pull-downs 500 µL supernatant was applied to  
931 35 µL amylose resin (New England Biolabs) and incubated for two hours at 4°C.  
932 Subsequently, the resin was washed three times with 500 µL lysis buffer. The proteins  
933 were eluted in 50 µL lysis buffer supplemented with 20 mM maltose.

934

### 935 TCA protein precipitation

936 Overnight grown yeasts were refreshed in 5 ml synthetic media -Leu-Trp at an OD<sub>600</sub>  
937 =0.05 and grown until their OD<sub>600</sub> reached 0.8. For samples with MG132, MG132 (final  
938 concentration 10 µM) was added when cells reached an OD<sub>600</sub> around 0.6 and let grow  
939 until they reached 0.8. As addition of MG132 reduces the division time of the yeast  
940 samples with MG132 were processed independently of others to avoid the introduction  
941 of artifacts by keeping other samples on ice.

942 1.25 ml of 100% ice cold TCA (20% final concentration) was added and cells were  
943 harvested (5 min, 4,500 rpm, 4°C). Cells were washed with 1 ml of ice-cold 10% TCA  
944 and transferred into 1.5 ml Eppendorf tubes. Next, cells were spun (10 min, 13,000 rpm,  
945 4°C). 200 µl of ice-cold 10% TCA and 200 µl of acid washed glass beads were added  
946 to the pellet. Cells were broken using a FastPrep-24 5G instrument (MP Biomedicals)  
947 with 3 cycles (6.5 m/s, 45 sec, pause 5 min, 4°C). The supernatant was transferred to a  
948 fresh Eppendorf tube and beads were washed 3 times with 200 µl of ice-cold 10% TCA  
949 and the washes collected together with the supernatant. Eppendorf tubes were spun for  
950 10 min at 5,000 rpm, 4°C. The pellet was resuspended in 200 µl of GSD buffer (40 nM  
951 Tris/HCl pH6.8, 8 M urea, 5% SDS, 0.1 nM EDTA, 2% (v/v) β-mercaptoethanol, traces  
952 of bromophenol). After addition of 25 µl of unbuffered 1 M Tris base samples were boiled  
953 (10 min) and spun down (5 min, 1,000 rpm) before loading 5 to 30 µl on the SDS gel.

954

### 955 Whole worm extract

956 Pre-selected L4 worms (200 per genotypes and per assay) were left at 20°C for 24  
957 hours. Adults were collected into 30 µl TE buffer (10 mM Tris, 1 mM EDTA, pH8) into a  
958 1.5 ml Eppendorf tube. After the addition of 1x Laemmli the Eppendorf tubes were  
959 submitted to three cycles of freeze thawing.

960

### 961 Nuclei isolation and protein fractionation from large *C. elegans* cultures

962 Nuclei isolation and cellular fractionation were done as in (Silva et al, 2014). Briefly,  
963 large cultures of *C. elegans* were prepared by seeding twenty 100 mm NGM plates with

964 1 ml of OP50 bacteria (obtained from resuspending 2 liters of an overnight *E. coli* culture  
965 in a final volume of 40 ml). Between 5,000 to 6,000 *C. elegans* embryos were added to  
966 each 100 mm plate, and the plates were incubated at 20°C for three days. Young adult  
967 worms were collected and transferred to 50 ml tubes by washing the plates with M9,  
968 and tubes were left on a rack for 15 minutes to allow the worms to pellet by gravity, at  
969 which time most of the M9 was removed and fresh M9 solution was added. This washing  
970 step was repeated 3 times. The final wash was performed using NP buffer (10 mM  
971 HEPES-KOH pH 7.6, 1mM EGTA, 10 mM KCl, 1.5 mM MgCl<sub>2</sub>, 0.25 mM Sucrose, 1 mM  
972 PMSF and 1 mM DTT) containing protease inhibitors and worms were pelleted by  
973 centrifugation at 600 g for 2 minutes. 1 ml of this worm pellet was used to isolate nuclei.  
974 To isolate nuclei, worms were broken using a cooled metal Wheaton tissue grinder and  
975 the resulting worm solution was filtered first using a 100 µm mesh, followed by a second  
976 filtration with a 40 µm mesh. The filtered solution was then centrifuged at 300 g for two  
977 minutes at 4°C, and the supernatant from this step, which contains nuclei, was further  
978 centrifuged at 2,500 g for 10 minutes at 4°C. The resulting supernatant was used as  
979 cytosolic fraction, while germ line nuclei were contained in the pellet. In order to separate  
980 the nuclear soluble and the DNA-bound protein fractions from these nuclei, we used a  
981 Qproteome Nuclear Protein Kit from Qiagen according to manufacturer's instructions.

982

## 983 Western Blot

984 Samples were prepared as follows: 50 µg of the cellular fraction were mixed with 1x  
985 Laemmli whereas for the proteins extract from yeast the same amount of proteins  
986 (based on their OD<sub>600</sub> at the time they were collected) was loaded to each well.

987 Samples were run in 1× SDS-Tris-glycine buffer on a pre-cast 4%-20% TGX gels  
988 (BioRad). Proteins were transferred onto PVDF membrane (activated in methanol for  
989 20 seconds) for 1 hour at 4°C at 100V in 1× Tris-glycine buffer containing 20% methanol.  
990 Membranes were blocked for 1 hour in 1× TBS containing 0.1% Tween (TBST) and 5%  
991 milk; primary antibodies were added to the same buffer and incubated over night at 4°C.  
992 Membranes were then washed in 1× TBST and incubated with the secondary antibody  
993 in TBST containing 5% milk for 1 hour at room temperature. After washing, membranes  
994 were incubated with WesternBright ECL (Advansta) and developed with a ChemiDoc  
995 system (BioRad).

996

## 997 Mass Spectrometry

998 Proteins were eluted from the beads by 3 x 20uL 100mM glycine, pH2. Supernatants  
999 were collected and the pH was adjusted to alkaline by addition of 1M TRIS pH 8.  
1000 Disulfide bridge were reduced by DTT at a final concentration of 10mM for 30 min at  
1001 room temperature. Free thiols were then alkylated with iodo acetamide (IAA) at a  
1002 concentration of 20 mM for 30min at RT in the dark. Excess IAA was quenched with half  
1003 of the amount of DTT used for reduction. Proteins were digested with 300ng trypsin over  
1004 night at 37°C. Digests were acidified adding TFA to a final concentration of 1%. Peptides  
1005 were desalted on StageTips (Rappsilber et al., 2007) and further purified according to  
1006 the SP2 protocol by Waas (Waas et al., 2019).

1007 Peptide samples were separated on an Ultimate 3000 RSLC nano-flow chromatography  
1008 system (Thermo Scientific Dionex), using a pre-column for sample loading  
1009 (PepMapAcclaim C18, 2 cm × 0.1 mm, 5 μm) and a C18 analytical column  
1010 (PepMapAcclaim C18, 50 cm × 0.75 mm, 2 μm; both Thermo Scientific Dionex),  
1011 applying a linear gradient from 2 to 35% solvent B (80% acetonitrile, 0.1% formic acid;  
1012 solvent A 0.1% formic acid) at a flow rate of 230 nl/min over 120 minutes. Eluting  
1013 peptides were analysed on a Q Exactive HF-X Orbitrap mass spectrometer (Thermo  
1014 Scientific). For the data-dependent mode survey scans were acquired in a mass range  
1015 of 375–1,500 m/z with lock mass on, at a resolution of 120,000 at 200 m/z. The AGC  
1016 target value was set to 3E6 with a maximal injection time of 60 ms. The 8 most intense  
1017 ions were selected with an isolation width of 1.6 and 0.2 m/z offset, and fragmented in  
1018 the HCD cell with a normalized collision energy of 28%. Spectra were recorded at a  
1019 target value of 1E5 with a maximal injection time of 150 ms and a resolution of 30,000.  
1020 Peptides with unassigned charge state, a charge of +1 or > +7 were excluded from  
1021 fragmentation. The peptide match feature was set to preferred and exclude isotope  
1022 feature was enabled. Selected precursors were dynamically excluded from repeated  
1023 sampling for 30 s.

1024 Raw data were processed using the MaxQuant software package 1.6.0.16  
1025 (<http://www.maxquant.org/>) (Cox and Mann, 2008) searching against the uniprot  
1026 reference database of *C. elegans* and a custom made database of common  
1027 contaminants. The search was performed with full tryptic specificity and a maximum of  
1028 two missed cleavages. Carbamidomethylation of cysteine residues was set as fixed,  
1029 oxidation of methionine, phosphorylation on serine, threonine and tyrosine, and N-  
1030 terminal protein acetylation as variable modifications—all other parameters were set to  
1031 default. The match between run feature and the search for 2nd peptides was enabled.

1032 Results were filtered at protein and peptide level for a false discovery rate of 1%. The  
1033 protein groups table was imported into Perseus 1.6.2.1 (Tyanova et al., 2016), reverse  
1034 hits and contaminants were filtered out as well as hits with less than 2 valid LFQ values  
1035 in at least 1 experimental group. Missing LFQ values were imputed by values from a  
1036 normal distribution. Data were statistically analyzed with LIMMA (Ritchie et al., 2015).

1037  
1038 **Electron microscopy**  
1039 24 hours post L4 stage *chk-2::ha* worms were immersed in 2% paraformaldehyde and  
1040 0.2% glutaraldehyde (both EM-grade, EMS, USA) in 0.1 M PHEM buffer (pH 7) for 2h  
1041 at RT, then overnight at 4°C. The fixed gonads were embedded in 12% gelatin and cut  
1042 into 1 mm<sup>3</sup> blocks which were infiltrated with 2.3 M sucrose overnight at 4°C. These  
1043 blocks were mounted onto Leica specimen carrier (Leica Microsystems, Austria) and  
1044 frozen in liquid nitrogen. With a Leica UCT/FCS cryo-ultramicrotome (Leica  
1045 Microsystems, Austria) the frozen blocks were cut into ultra-thin sections at a nominal  
1046 thickness of 60nm at -120°C. A mixture of 2% methylcellulose (25 centipoises) and 2.3  
1047 M sucrose in a ratio of 1:1 was used as a pick-up solution. Sections were picked up onto  
1048 200 mesh Ni grids (Gilder Grids, UK) with a carbon coated formvar film (Agar Scientific,  
1049 UK). Fixation, embedding and cryo-sectioning as described (Tokuyasu, 1973).

1050 Prior to immunolabeling, grids were placed on plates with solidified 2% gelatin and  
1051 warmed up to 37 °C for 20 min to remove the pick-up solution. After quenching of free  
1052 aldehyde-groups with glycine (0.1% for 15 min), a blocking step with 1% BSA (fraction  
1053 V) in 0.1 M Sörensen phosphate buffer (pH 7.4) was performed for 40 min. The grids  
1054 were incubated in primary antibody, rabbit polyclonal to hemagglutinin, diluted 1:200 in  
1055 0.1 M Sörensen phosphate buffer over night at 4°C, followed by a 2h incubation in the  
1056 secondary antibody, a goat-anti-rabbit antibody coupled with 6 nm gold, diluted 1:20 in  
1057 0.1 M Sörensen phosphate buffer, performed at RT. The sections were stained with 4%  
1058 uranyl acetate (Merck, Germany) and 2% methylcellulose in a ratio of 1:9 (on ice). All  
1059 labeling steps were done in a wet chamber. The sections were inspected using a FEI  
1060 Morgagni 268D TEM (FEI, The Netherlands) operated at 80kV. Electron micrographs  
1061 were acquired using an 11 megapixel Morada CCD camera from Olympus-SIS  
1062 (Germany).

1063  
1064 **Quantification of gold particles**

1065 Pictures were stitched in Photoshop to assemble the nucleus. The nuclear diameter was  
1066 measured vertically, horizontally and the two diagonals using ImageJ. From the 4  
1067 measurements, we extracted the radius,  $r_1$ , of the nucleus. To compute the radius of  
1068 the two circles inscribed in the nucleus and dividing the nucleus into 3 areas of equal  
1069 size we used the following formulas:  $r_2 = \sqrt{\frac{2}{3}}r_1$  (radius of most outer inscribed circle)  
1070 and  $r_3 = \sqrt{\frac{1}{3}}r_1$  (radius of most outer inscribed circle). The nuclear membrane was traced  
1071 in ImageJ with broken lines and using the line thickness the different zones were drawn.  
1072 Gold particles were manually counted in Photoshop for each zone.

1073

#### 1074 Line profile analysis

1075 Using ImageJ a line of 20 pixels width covering the diameter of a mitotic nucleus was  
1076 created to measure the signal of HA antibody detection and added to the region of  
1077 interest manager. At least 25 nuclei from the progenitor zone were processed this way.  
1078 After collection of these line profiles, using R software the line profiles were resampled  
1079 using the longest track as reference and then averaged. Averaged line profiles were  
1080 plotted using GraphPad Prism6.

1081

#### 1082 QUANTIFICATION AND STATISTICAL ANALYSIS

1083 Statistical analyses were performed in GraphPad Prism6. Datasets were tested for  
1084 normal distribution; depending on outcome, populations were tested for significant  
1085 differences using the two-tailed Fisher's exact test or Mann–Whitney test or Chi-square  
1086 test, as appropriate for each dataset.

1087

1088



## 1089 References

- 1090
- 1091 Adamo, A., Woglar, A., Silva, N., Penkner, A., Jantsch, V., and La Volpe, A. (2012).  
1092 Transgene-mediated cosuppression and RNA interference enhance germ-line  
1093 apoptosis in *Caenorhabditis elegans*. *Proc Natl Acad Sci U S A* *109*, 3440-3445.
- 1094 Alpi, A., Pasierbek, P., Gartner, A., and Loidl, J. (2003). Genetic and cytological  
1095 characterization of the recombination protein RAD-51 in *Caenorhabditis elegans*.  
1096 *Chromosoma* *112*, 6-16.
- 1097 Aubert, Y., Egolf, S., and Capell, B.C. (2019). The Unexpected Noncatalytic Roles of  
1098 Histone Modifiers in Development and Disease. *Trends in genetics : TIG* *35*, 645-657.
- 1099 Biedermann, B., Wright, J., Senften, M., Kalchhauser, I., Sarathy, G., Lee, M.H., and  
1100 Ciosk, R. (2009). Translational repression of cyclin E prevents precocious mitosis and  
1101 embryonic gene activation during *C. elegans* meiosis. *Dev Cell* *17*, 355-364.
- 1102 Bork, P., Brown, N.P., Hegyi, H., and Schultz, J. (1996). The protein phosphatase 2C  
1103 (PP2C) superfamily: detection of bacterial homologues. *Protein Sci* *5*, 1421-1425.
- 1104 Brenner, S. (1974). The genetics of *Caenorhabditis elegans*. *Genetics* *77*, 71-94.
- 1105 Castellano-Pozo, M., Pacheco, S., Sioutas, G., Jaso-Tamame, A.L., Dore, M.H., Karimi,  
1106 M.M., and Martinez-Perez, E. (2020). Surveillance of cohesin-supported chromosome  
1107 structure controls meiotic progression. *Nat Commun* *11*, 4345.
- 1108 Chen, J., Mohammad, A., Pazdernik, N., Huang, H., Bowman, B., Tycksen, E., and  
1109 Schedl, T. (2020). GLP-1 Notch-LAG-1 CSL control of the germline stem cell fate is  
1110 mediated by transcriptional targets *lst-1* and *sygl-1*. *PLoS Genet* *16*, e1008650.
- 1111 Colaiacovo, M.P., MacQueen, A.J., Martinez-Perez, E., McDonald, K., Adamo, A., La  
1112 Volpe, A., and Villeneuve, A.M. (2003). Synaptonemal complex assembly in *C. elegans*  
1113 is dispensable for loading strand-exchange proteins but critical for proper completion of  
1114 recombination. *Dev Cell* *5*, 463-474.

- 1115 Cox, J., and Mann, M. (2008). MaxQuant enables high peptide identification rates,  
1116 individualized p.p.b.-range mass accuracies and proteome-wide protein quantification.  
1117 *Nat Biotechnol* 26, 1367-1372.
- 1118 Crawley, O., Barroso, C., Testori, S., Ferrandiz, N., Silva, N., Castellano-Pozo, M., Jaso-  
1119 Tamame, A.L., and Martinez-Perez, E. (2016). Cohesin-interacting protein WAPL-1  
1120 regulates meiotic chromosome structure and cohesion by antagonizing specific cohesin  
1121 complexes. *Elife* 5, e10851.
- 1122 Crittenden, S.L., Leonhard, K.A., Byrd, D.T., and Kimble, J. (2006). Cellular analyses of  
1123 the mitotic region in the *Caenorhabditis elegans* adult germ line. *Molecular biology of*  
1124 *the cell* 17, 3051-3061.
- 1125 Dello Stritto, M.R., Bauer, B., Barraud, P., and Jantsch, V. (2021). DNA topoisomerase  
1126 3 is required for efficient germ cell quality control. *J Cell Biol* 220.
- 1127 Dernburg, A.F., McDonald, K., Moulder, G., Barstead, R., Dresser, M., and Villeneuve,  
1128 A.M. (1998). Meiotic recombination in *C. elegans* initiates by a conserved mechanism  
1129 and is dispensable for homologous chromosome synapsis. *Cell* 94, 387-398.
- 1130 Fiscella, M., Zhang, H., Fan, S., Sakaguchi, K., Shen, S., Mercer, W.E., Vande Woude,  
1131 G.F., O'Connor, P.M., and Appella, E. (1997). Wip1, a novel human protein  
1132 phosphatase that is induced in response to ionizing radiation in a p53-  
1133 dependent manner. *Proceedings of the National Academy of Sciences* 94, 6048-6053.
- 1134 Fox, P.M., Vought, V.E., Hanazawa, M., Lee, M.H., Maine, E.M., and Schedl, T. (2011).  
1135 Cyclin E and CDK-2 regulate proliferative cell fate and cell cycle progression in the *C.*  
1136 *elegans* germline. *Development* 138, 2223-2234.
- 1137 Gartner, A., Boag, P.R., and Blackwell, T.K. (2008). Germline survival and apoptosis.  
1138 *WormBook : the online review of C elegans biology*, 1-20.
- 1139 Gartner, A., MacQueen, A.J., and Villeneuve, A.M. (2004a). Methods for Analyzing  
1140 Checkpoint Responses in *Caenorhabditis elegans*. In *Checkpoint Controls and Cancer:*

- 1141 Volume 1: Reviews and Model Systems, A.H. Schönthal, ed. (Totowa, NJ: Humana  
1142 Press), pp. 257-274.
- 1143 Gartner, A., MacQueen, A.J., and Villeneuve, A.M. (2004b). Methods for analyzing  
1144 checkpoint responses in *Caenorhabditis elegans*. *Methods Mol Biol* 280, 257-274.
- 1145 Gerton, J.L., and Hawley, R.S. (2005). Homologous chromosome interactions in  
1146 meiosis: diversity amidst conservation. *Nat Rev Genet* 6, 477-487.
- 1147 Goloudina, A.R., Kochetkova, E.Y., Pospelova, T.V., and Demidov, O.N. (2016). Wip1  
1148 phosphatase: between p53 and MAPK kinases pathways. *Oncotarget* 7, 31563-31571.
- 1149 Goodyer, W., Kaitna, S., Couteau, F., Ward, J.D., Boulton, S.J., and Zetka, M. (2008).  
1150 HTP-3 links DSB formation with homolog pairing and crossing over during *C. elegans*  
1151 meiosis. *Developmental cell* 14, 263-274.
- 1152 Hansen, D., Wilson-Berry, L., Dang, T., and Schedl, T. (2004). Control of the  
1153 proliferation versus meiotic development decision in the *C. elegans* germline through  
1154 regulation of GLD-1 protein accumulation. *Development* 131, 93-104.
- 1155 Hillers, K.J., Jantsch, V., Martinez-Perez, E., and Yanowitz, J.L. (2017). Meiosis.  
1156 *WormBook : the online review of C elegans biology*, 1-43.
- 1157 Hubbard, E.J.A., and Schedl, T. (2019). Biology of the *Caenorhabditis elegans* Germline  
1158 Stem Cell System. *Genetics* 213, 1145-1188.
- 1159 Jaiswal, H., Benada, J., Müllers, E., Akopyan, K., Burdova, K., Koolmeister, T.,  
1160 Helleday, T., Medema, R.H., Macurek, L., and Lindqvist, A. (2017). ATM/Wip1 activities  
1161 at chromatin control Plk1 re-activation to determine G2 checkpoint duration. *The EMBO*  
1162 *journal* 36, 2161-2176.
- 1163 Jantsch, V., Pasierbek, P., Mueller, M.M., Schweizer, D., Jantsch, M., and Loidl, J.  
1164 (2004). Targeted gene knockout reveals a role in meiotic recombination for ZHP-3, a  
1165 Zip3-related protein in *Caenorhabditis elegans*. *Mol Cell Biol* 24, 7998-8006.

- 1166 Jantsch, V., Tang, L., Pasierbek, P., Penkner, A., Nayak, S., Baudrimont, A., Schedl,  
1167 T., Gartner, A., and Loidl, J. (2007). *Caenorhabditis elegans* prom-1 is required for  
1168 meiotic prophase progression and homologous chromosome pairing. *Molecular biology*  
1169 *of the cell* 18, 4911-4920.
- 1170 Kamath, R.S., Martinez-Campos, M., Zipperlen, P., Fraser, A.G., and Ahringer, J.  
1171 (2001). Effectiveness of specific RNA-mediated interference through ingested double-  
1172 stranded RNA in *Caenorhabditis elegans*. *Genome Biol* 2, RESEARCH0002.
- 1173 Kim, Y., Kostow, N., and Dernburg, A.F. (2015). The Chromosome Axis Mediates  
1174 Feedback Control of CHK-2 to Ensure Crossover Formation in *C. elegans*. *Dev Cell* 35,  
1175 247-261.
- 1176 Kocsisova, Z., Mohammad, A., Kornfeld, K., and Schedl, T. (2018). Cell Cycle Analysis  
1177 in the *C. elegans* Germline with the Thymidine Analog EdU. *J Vis Exp*.
- 1178 Le Guezennec, X., and Bulavin, D.V. (2010). WIP1 phosphatase at the crossroads of  
1179 cancer and aging. *Trends Biochem Sci* 35, 109-114.
- 1180 Link, J., and Jantsch, V. (2019). Meiotic chromosomes in motion: a perspective from  
1181 *Mus musculus* and *Caenorhabditis elegans*. *Chromosoma* 128, 317-330.
- 1182 Link, J., Paouneskou, D., Velkova, M., Daryabeigi, A., Laos, T., Labella, S., Barroso, C.,  
1183 Pacheco Pinol, S., Montoya, A., Kramer, H., *et al.* (2018). Transient and Partial Nuclear  
1184 Lamina Disruption Promotes Chromosome Movement in Early Meiotic Prophase. *Dev*  
1185 *Cell* 45, 212-225 e217.
- 1186 MacQueen, A.J., Colaiacovo, M.P., McDonald, K., and Villeneuve, A.M. (2002).  
1187 Synapsis-dependent and -independent mechanisms stabilize homolog pairing during  
1188 meiotic prophase in *C. elegans*. *Genes Dev* 16, 2428-2442.
- 1189 MacQueen, A.J., and Villeneuve, A.M. (2001). Nuclear reorganization and homologous  
1190 chromosome pairing during meiotic prophase require *C. elegans* chk-2. *Genes Dev* 15,  
1191 1674-1687.

1192 Martinez-Perez, E., and Villeneuve, A.M. (2005). HTP-1-dependent constraints  
1193 coordinate homolog pairing and synapsis and promote chiasma formation during *C.*  
1194 *elegans* meiosis. *Genes & development* *19*, 2727-2743.

1195 Mohammad, A., Vanden Broek, K., Wang, C., Daryabeigi, A., Jantsch, V., Hansen, D.,  
1196 and Schedl, T. (2018). Initiation of Meiotic Development Is Controlled by Three Post-  
1197 transcriptional Pathways in *Caenorhabditis elegans*. *Genetics* *209*, 1197-1224.

1198 Nayak, S., Santiago, F.E., Jin, H., Lin, D., Schedl, T., and Kipreos, E.T. (2002). The  
1199 *Caenorhabditis elegans* Skp1-related gene family: diverse functions in cell proliferation,  
1200 morphogenesis, and meiosis. *Curr Biol* *12*, 277-287.

1201 Norris, A.D., Kim, H.M., Colaiacovo, M.P., and Calarco, J.A. (2015). Efficient Genome  
1202 Editing in *Caenorhabditis elegans* with a Toolkit of Dual-Marker Selection Cassettes.  
1203 *Genetics* *201*, 449-458.

1204 Paix, A., Folkmann, A., Rasoloson, D., and Seydoux, G. (2015). High Efficiency,  
1205 Homology-Directed Genome Editing in *Caenorhabditis elegans* Using CRISPR-Cas9  
1206 Ribonucleoprotein Complexes. *Genetics* *201*, 47-54.

1207 Pechackova, S., Burdova, K., and Macurek, L. (2017). WIP1 phosphatase as  
1208 pharmacological target in cancer therapy. *J Mol Med (Berl)* *95*, 589-599.

1209 Penkner, A.M., Fridkin, A., Gloggnitzer, J., Baudrimont, A., Machacek, T., Woglar, A.,  
1210 Csaszar, E., Pasierbek, P., Ammerer, G., Gruenbaum, Y., *et al.* (2009). Meiotic  
1211 chromosome homology search involves modifications of the nuclear envelope protein  
1212 Matefin/SUN-1. *Cell* *139*, 920-933.

1213 Petsalaki, E., and Zachos, G. (2020). DNA damage response proteins regulating mitotic  
1214 cell division: double agents preserving genome stability. *The FEBS journal* *287*, 1700-  
1215 1721.

- 1216 Rappsilber, J., Mann, M., and Ishihama, Y. (2007). Protocol for micro-purification,  
1217 enrichment, pre-fractionation and storage of peptides for proteomics using StageTips.  
1218 *Nat Protoc* 2, 1896-1906.
- 1219 Reiterer, V., Pawlowski, K., Desrochers, G., Pause, A., Sharpe, H.J., and Farhan, H.  
1220 (2020). The dead phosphatases society: a review of the emerging roles of  
1221 pseudophosphatases. *The FEBS journal* 287, 4198-4220.
- 1222 Ritchie, M.E., Phipson, B., Wu, D., Hu, Y., Law, C.W., Shi, W., and Smyth, G.K. (2015).  
1223 limma powers differential expression analyses for RNA-sequencing and microarray  
1224 studies. *Nucleic Acids Res* 43, e47.
- 1225 Rosu, S., Zawadzki, K.A., Stamper, E.L., Libuda, D.E., Reese, A.L., Dernburg, A.F., and  
1226 Villeneuve, A.M. (2013). The *C. elegans* DSB-2 Protein Reveals a Regulatory Network  
1227 that Controls Competence for Meiotic DSB Formation and Promotes Crossover  
1228 Assurance. *PLoS genetics* 9, e1003674.
- 1229 Sato, A., Isaac, B., Phillips, C.M., Rillo, R., Carlton, P.M., Wynne, D.J., Kasad, R.A., and  
1230 Dernburg, A.F. (2009). Cytoskeletal forces span the nuclear envelope to coordinate  
1231 meiotic chromosome pairing and synapsis. *Cell* 139, 907-919.
- 1232 Schild-Prufert, K., Saito, T.T., Smolikov, S., Gu, Y., Hincapie, M., Hill, D.E., Vidal, M.,  
1233 McDonald, K., and Colaiacovo, M.P. (2011). Organization of the synaptonemal complex  
1234 during meiosis in *Caenorhabditis elegans*. *Genetics* 189, 411-421.
- 1235 Schmittgen, T.D., and Livak, K.J. (2008). Analyzing real-time PCR data by the  
1236 comparative CT method. *Nature Protocols* 3, 1101-1108.
- 1237 Shaltiel, I.A., Krenning, L., Bruinsma, W., and Medema, R.H. (2015). The same, only  
1238 different – DNA damage checkpoints and their reversal throughout the cell cycle. *J Cell*  
1239 *Sci* 128, 607-620.
- 1240 Simon-Kayser, B., Scoul, C., Renaudin, K., Jezequel, P., Bouchot, O., Rigaud, J., and  
1241 Bezieau, S. (2005). Molecular cloning and characterization of FBXO47, a novel gene



1242 containing an F-box domain, located in the 17q12 band deleted in papillary renal cell  
1243 carcinoma. *Genes Chromosomes Cancer* 43, 83-94.

1244 Stamper, E.L., Rodenbusch, S.E., Rosu, S., Ahringer, J., Villeneuve, A.M., and  
1245 Dernburg, A.F. (2013). Identification of DSB-1, a Protein Required for Initiation of Meiotic  
1246 Recombination in *Caenorhabditis elegans*, Illuminates a Crossover Assurance  
1247 Checkpoint. *PLoS genetics* 9, e1003679.

1248 Takekawa, M., Adachi, M., Nakahata, A., Nakayama, I., Itoh, F., Tsukuda, H., Taya, Y.,  
1249 and Imai, K. (2000). p53-inducible wip1 phosphatase mediates a negative feedback  
1250 regulation of p38 MAPK-p53 signaling in response to UV radiation. *EMBO J* 19, 6517-  
1251 6526.

1252 Tang, L., Machacek, T., Mamnun, Y.M., Penkner, A., Gloggnitzer, J., Wegrostek, C.,  
1253 Konrat, R., Jantsch, M.F., Loidl, J., and Jantsch, V. (2010). Mutations in *Caenorhabditis*  
1254 *elegans* him-19 show meiotic defects that worsen with age. *Molecular biology of the cell*  
1255 21, 885-896.

1256 Timson, J. (1975). Hydroxyurea. *Mutat Res* 32, 115-132.

1257 Tokuyasu, K.T. (1973). A technique for ultracryotomy of cell suspensions and tissues. *J*  
1258 *Cell Biol* 57, 551-565.

1259 Tyanova, S., Temu, T., Sinitcyn, P., Carlson, A., Hein, M.Y., Geiger, T., Mann, M., and  
1260 Cox, J. (2016). The Perseus computational platform for comprehensive analysis of  
1261 (prote)omics data. *Nat Methods* 13, 731-740.

1262 Waas, M., Pereckas, M., Jones Lipinski, R.A., Ashwood, C., and Gundry, R.L. (2019).  
1263 SP2: Rapid and Automatable Contaminant Removal from Peptide Samples for  
1264 Proteomic Analyses. *J Proteome Res* 18, 1644-1656.

1265 Woglar, A., and Jantsch, V. (2013). Chromosome movement in meiosis I prophase of  
1266 *Caenorhabditis elegans*. *Chromosoma*.

1267 Zetka, M.C., Kawasaki, I., Strome, S., and Muller, F. (1999). Synapsis and chiasma  
1268 formation in *Caenorhabditis elegans* require HIM-3, a meiotic chromosome core  
1269 component that functions in chromosome segregation. *Genes & development* 13, 2258-  
1270 2270.

1271 Zhang, Y., Chen, D., Smith, M.A., Zhang, B., and Pan, X. (2012). Selection of reliable  
1272 reference genes in *Caenorhabditis elegans* for analysis of nanotoxicity. *PLoS One* 7,  
1273 e31849.

1274

1275

1276 Strains and reagents

1277

| REAGENT or RESOURCE                      | SOURCE                                                     | IDENTIFIER        |
|------------------------------------------|------------------------------------------------------------|-------------------|
| <b>Antibodies</b>                        |                                                            |                   |
| Rat anti HA (1:600)                      | Roche                                                      | Cat # 11867423001 |
| Rabbit polyclonal anti HA (1:1,000)      | Sigma                                                      | Cat # H6908       |
| Rabbit anti WAPL-1 (1:2,000)             | Novus                                                      | Cat # 49300002    |
| Guinea pig polyclonal anti HTP-3 (1:500) | (Goodyer et al., 2008)                                     | N/A               |
| Rabbit anti SYP-1 (1:500)                | Gift from Nicola Silva, Masaryk University, Czech Republic | N/A               |
| Rabbit anti REC-8 (1:100)                | (Pasierbek et al., 2001)                                   | N/A               |
| Guinea pig anti-SUN-1 (1:500)            | (Penkner et al., 2009)                                     | N/A               |
| Mouse anti FLAG (1:1,000)                | SIGMA                                                      | Cat # F3165       |
| Rabbit anti-HIM-3 (1:750)                | Novus                                                      | Cat # 53470002    |
| Guinea pig anti-SUN-1(S8Pi) (1:750)      | (Penkner et al., 2009)                                     | N/A               |
| Mouse anti CYE-1 (1:10)                  | (Brodigan et al., 2003)                                    | N/A               |
| Mouse anti-HA (1:500)                    | Thermo Fisher Scientific                                   | Cat # 26183       |
| Chicken anti-HIM-3 (1:500)               | (Hurlock et al., 2020)                                     | N/A               |
| Rabbit anti pHIM-8/ZIMs (1 ug/ml)        | (Kim et al., 2015)                                         | N/A               |

|                                                      |                        |                   |
|------------------------------------------------------|------------------------|-------------------|
| Goat anti rabbit Alexa Fluor 568 (1:400)             | Invitrogen             | Cat # A-11036     |
| Goat anti guinea pig Alexa Fluor 488 (1:400)         | Invitrogen             | Cat # A-11073     |
| Goat anti mouse Alexa Fluor 594 (1:500)              | Invitrogen             | Cat # A-11032     |
| Goat-anti-rabbit 6 nm gold                           | Aurion                 | Cat # 800.011     |
| Donkey anti-Mouse Alexa Fluor 488 (1:200)            | Invitrogen             | Cat # A-21202     |
| Donkey anti-Rabbit Alexa Fluor 555 (1:200)           | Invitrogen             | Cat # A-31572     |
| Donkey Anti-Chicken Alexa Fluor 647 (1:200)          | Jackson ImmunoResearch | Cat# 703-605-155  |
| Anti-mouse Abberior STAR 635P (1:200)                | Abberior               | Cat # ST635P-1001 |
| Anti-rabbit Abberior STAR 635P (1:200)               | Abberior               | Cat # ST635P-1007 |
| Mouse monoclonal anti HA (1:1,000)                   | Cell Signaling         | Cat # 2367S       |
| Rabbit polyclonal anti histone H3 (1:100,000)        | Abcam                  | Cat # ab1791      |
| Mouse anti GAPDH (1:5,000)                           | Ambion                 | Cat # AM4300      |
| Mouse anti LexA (1:50,000)                           | Stefan Schuechner      | N/A               |
| Mouse anti FLAG (1:1,000)                            | SIGMA                  | Cat # F3165       |
| Goat anti rabbit HRP-conjugated (1:15,000)           | Thermofisher           | Cat # G21234      |
| Goat anti mouse HRP-conjugated (1:10,000)            | Thermofisher           | Cat # G21040      |
| <b>Chemicals, Peptides, and Recombinant Proteins</b> |                        |                   |
| Hydroxy Urea                                         | Sigma-Aldrich          | Cat # H8627-10G   |

|                                                                               |                    |                                                                                   |
|-------------------------------------------------------------------------------|--------------------|-----------------------------------------------------------------------------------|
| Ethyl methane sulfonate (EMS)                                                 | Sigma-Aldrich      | Cat # M0880-1G                                                                    |
| (-)-Tetramisole hydrochloride                                                 | Sigma-Aldrich      | Cat # L9756                                                                       |
| Blocking reagent                                                              | Roche              | Cat # 11096176001                                                                 |
| <b>Critical Commercial Assays</b>                                             |                    |                                                                                   |
| Qproteome Nuclear Protein Kit                                                 | Qiagen             | Cat # 37582                                                                       |
| SYTO-12                                                                       | ThermoFischer      | Cat # S7574                                                                       |
| Vectashield Mounting Medium                                                   | Vector Labs        | Cat # H-1000                                                                      |
| EdU-labeling kit                                                              | Invitrogen         | Cat # C10337                                                                      |
| amylose resin                                                                 | New England Biolab | Cat # E8021S                                                                      |
| Superscript III                                                               | Invitrogen         | Cat # 18080051                                                                    |
| SensiFAST™ SYBR® No-ROX Kit                                                   | Bioline            | Cat # BIO-98005                                                                   |
| <b>Experimental Models: Organisms/Strains</b>                                 |                    |                                                                                   |
| <i>C. elegans</i> : N2 Bristol                                                | CGC                | <a href="https://cgc.umn.edu/strain/search">https://cgc.umn.edu/strain/search</a> |
| <i>C. elegans</i> : <i>prom-1(jf124[prom-1::ha])</i>                          | This study         | UV145                                                                             |
| <i>C. elegans</i> : <i>ppm-1.D(jf76)III; prom-1(ok1140) unc-55(e402) I</i>    | This study         | UV157                                                                             |
| <i>C. elegans</i> : <i>ppm-1.D(tm8369)/qC1[dpy-19(e1259) glp-1(q339)] III</i> | This study         | UV176                                                                             |
| <i>C. elegans</i> : <i>ppm-1.D(tm8369)III; chk-2(jf184[chk-2::ha]) V</i>      | This study         | UV177                                                                             |
| <i>C. elegans</i> : <i>ppm-1.D(jf120)/qC1[dpy-19(e1259) glp-1(q339)] III</i>  | This study         | UV178                                                                             |

|                                                                                                                                                           |            |       |
|-----------------------------------------------------------------------------------------------------------------------------------------------------------|------------|-------|
| <i>C. elegans</i> : ppm-1.D(jf120) III; chk-2(jf184[chk-2::ha]) V                                                                                         | This study | UV179 |
| <i>C. elegans</i> : ppm-1.D(jf182[ppm-1.D(CD)]) III; chk-2(jf184[chk-2::ha]) V                                                                            | This study | UV180 |
| <i>C. elegans</i> : ppm-1.D(jf181[ppm-1.D(tm8369+CD)]) III; chk-2(jf184[chk-2::ha]) V                                                                     | This study | UV181 |
| <i>C. elegans</i> : chk-2(jf184[chk-2::ha]) V                                                                                                             | This study | UV182 |
| <i>C. elegans</i> : ppm-1.D(jf183[ha::ppm-1.D]) III                                                                                                       | This study | UV183 |
| <i>C. elegans</i> : chk-2(jf185[chk-2::3xFLAG]) V; ppm-1.D(jf183[ha::ppm-1.D]) III                                                                        | This study | UV184 |
| <i>C. elegans</i> : prom-1(ok1140) unc-55(e402) I/ hT2[bli-4(e937) let-(q782) qls48](I;III)                                                               | This study | UV175 |
| <i>C. elegans</i> : ppm-1.D(jf183[ha::ppm-1.D]) III; prom-1(ok1140) unc-55(e402) /hT2[bli-4(e937) let-(q782) qls48](I;III)                                | This study | UV185 |
| <i>C. elegans</i> : ppm-1.D(jf183[ha::ppm-1.D]) III; prom-1(ok1140) unc-55(e402) /hT2[bli-4(e937) let-(q782) qls48](I;III); chk-2(jf185[chk-2::3xFLAG]) V | This study | UV238 |



|                                                                                                                            |                         |       |
|----------------------------------------------------------------------------------------------------------------------------|-------------------------|-------|
| <i>C. elegans: spo-11(ok79)/nT1[unc-?(n754) let-? qIs50](IV;V).</i>                                                        | (Dernburg et al., 1998) | AV106 |
| <i>C. elegans: ppm-1.D(tm8369) III; spo-11(ok79)/nT1[unc-?(n754) let-? qIs50](IV;V).</i>                                   | This study              | UV186 |
| <i>C. elegans: ppm-1.D(jf120) III; spo-11(ok79)/nT1[unc-?(n754) let-? qIs50](IV;V).</i>                                    | This study              | UV187 |
| <i>C. elegans: cep-1(gk138) I</i>                                                                                          | (Hofmann et al., 2002)  | TJ1   |
| <i>C. elegans: cep-1(gk138) I; ppm-1.D(tm8369)/qC1[dpy-19(e1259) glp-1(q339)] III</i>                                      | This study              | UV188 |
| <i>C. elegans: cep-1(gk138) I; ppm-1.D(jf120)/qC1[dpy-19(e1259) glp-1(q339)] III</i>                                       | This study              | UV189 |
| <i>C. elegans: ppm-1.D(jf183[ha::ppm-1.D]) III ; chk-2(me64) rol-9(sc148)/unc-51(e369) rol-9(sc148) V</i>                  | This study              | UV190 |
| <i>C. elegans: ppm-1.D(jf183[ha::ppm-1.D]) III; chkr-2(ok431) X</i>                                                        | This study              | UV237 |
| <i>C. elegans: ppm-1.D(jf183[ha::ppm-1.D]) III ; chk-2(me64) rol-9(sc148)/unc-51(e369) rol-9(sc148) V; chkr-2(ok431) X</i> | This study              | UV191 |
| <i>C. elegans: fog-2(oz40)</i>                                                                                             | (Clifford et al., 2000) | BS553 |

|                                                                                                                                                                                               |                                |                                   |
|-----------------------------------------------------------------------------------------------------------------------------------------------------------------------------------------------|--------------------------------|-----------------------------------|
| <i>C. elegans</i> : <i>gld-2(q497) gld-1(q485)/hT2 [bli-4(e937) let-?(q782) qIs48] (I;III) I; ppm-1.d::AID::HA (kim61) III; ieSi38 [sun-1p::TIR1::mRuby::sun-1 3'UTR + Cbr-unc-119(+)] IV</i> | This study                     | YKM393                            |
| <i>E. coli</i> BL21(DE3)                                                                                                                                                                      | Thermofisher                   | Cat # EC0114                      |
| <b>Recombinant DNA</b>                                                                                                                                                                        |                                |                                   |
| Peft-3::cas9-SV40-NLS::tbb-2 3'UTR was a gift from John Calarco                                                                                                                               | (Friedland et al., 2013)       | Addgene plasmid # 46168           |
| 3xHA::loxP::Pmyo-2_GFP::Prpl-28_neoR::loxP; gift from Monica Colaiacovo                                                                                                                       | (Norris et al., 2015)          | N/A                               |
| Co-injection marker Pmyo-2::mCherry::unc-54utr; gift from Erik Jorgensen                                                                                                                      | (Frokjaer-Jensen et al., 2008) | pCFJ90<br>Addgene plasmid # 19327 |
| Co-injection marker pGH8 - pRAB-3::mCherry::unc-54utr; gift from Erik Jorgensen                                                                                                               | (Frokjaer-Jensen et al., 2008) | pGH8<br>Addgene plasmid # 19359   |
| Peft-3::Cre                                                                                                                                                                                   | (Dickinson et al., 2013)       | pDD104<br>Addgene plasmid # 47551 |
| Homemade derivative of pBR322 (kanamycin resistance) GST-3C-CHEK-2-(3xFlag) (nematode CHEK-2)                                                                                                 | This study                     | N/A                               |
| Homemade derivative of pBR322 (kanamycin resistance) MBP-3C-PPM1D-His10 (nematode PPM-1.D)                                                                                                    | This study                     | N/A                               |

|                                                                                                            |                          |                                                                     |
|------------------------------------------------------------------------------------------------------------|--------------------------|---------------------------------------------------------------------|
| Homemade derivative of pBR322 (kanamycin resistance) MBP-3C-PPM1D (truncated)-His10 (nematode PPM-1.D)     | This study               | N/A                                                                 |
| Homemade derivative of pBR322 (kanamycin resistance) 10xHIS-MBP-3C-NRDE2 $\Delta$ N (human NRDE2)          | This study               | N/A                                                                 |
| <b>Oligonucleotides</b>                                                                                    |                          |                                                                     |
| Guide, repair template and genotyping primers used in this study in 5' to 3' orientation as DNA sequences. | This study               | Table S4                                                            |
| Primer pair used for qPCR.                                                                                 | This study               | Table S5                                                            |
| <b>Software and Algorithms</b>                                                                             |                          |                                                                     |
| ImageJ                                                                                                     | Schneider et al., (2012) | <a href="https://imagej.nih.gov/ij/">https://imagej.nih.gov/ij/</a> |
| Adobe Photoshop CC2018                                                                                     | Adobe                    | N/A                                                                 |
| Adobe Illustrator CC2018                                                                                   | Adobe                    | N/A                                                                 |
| GraphPad Prism 6                                                                                           | GraphPad                 | N/A                                                                 |
| RStudio                                                                                                    | RStudio                  | <a href="https://www.rstudio.com">https://www.rstudio.com</a>       |
| R                                                                                                          | The R foundation         | <a href="https://www.r-project.org/">https://www.r-project.org/</a> |

1278  
1279  
1280 Brodigan, T.M., Liu, J., Park, M., Kipreos, E.T., and Krause, M. (2003). Cyclin E  
1281 expression during development in *Caenorhabditis elegans*. *Dev Biol* 254, 102-115.  
1282 Clifford, R., Lee, M.H., Nayak, S., Ohmachi, M., Giorgini, F., and Schedl, T. (2000).  
1283 FOG-2, a novel F-box containing protein, associates with the GLD-1 RNA binding  
1284 protein and directs male sex determination in the *C. elegans* hermaphrodite germline.  
1285 *Development* 127, 5265-5276.

1286 Dernburg, A.F., McDonald, K., Moulder, G., Barstead, R., Dresser, M., and Villeneuve,  
1287 A.M. (1998). Meiotic recombination in *C. elegans* initiates by a conserved mechanism  
1288 and is dispensable for homologous chromosome synapsis. *Cell* *94*, 387-398.

1289 Dickinson, D.J., Ward, J.D., Reiner, D.J., and Goldstein, B. (2013). Engineering the  
1290 *Caenorhabditis elegans* genome using Cas9-triggered homologous recombination. *Nat*  
1291 *Methods* *10*, 1028-1034.

1292 Friedland, A.E., Tzur, Y.B., Esvelt, K.M., Colaiacovo, M.P., Church, G.M., and Calarco,  
1293 J.A. (2013). Heritable genome editing in *C. elegans* via a CRISPR-Cas9 system. *Nat*  
1294 *Methods*.

1295 Frokjaer-Jensen, C., Davis, M.W., Hopkins, C.E., Newman, B.J., Thummel, J.M.,  
1296 Olesen, S.P., Grunnet, M., and Jorgensen, E.M. (2008). Single-copy insertion of  
1297 transgenes in *Caenorhabditis elegans*. *Nat Genet* *40*, 1375-1383.

1298 Goodyer, W., Kaitna, S., Couteau, F., Ward, J.D., Boulton, S.J., and Zetka, M. (2008).  
1299 HTP-3 links DSB formation with homolog pairing and crossing over during *C. elegans*  
1300 meiosis. *Developmental cell* *14*, 263-274.

1301 Hofmann, E.R., Milstein, S., Boulton, S.J., Ye, M., Hofmann, J.J., Stergiou, L., Gartner,  
1302 A., Vidal, M., and Hengartner, M.O. (2002). *Caenorhabditis elegans* HUS-1 is a DNA  
1303 damage checkpoint protein required for genome stability and EGL-1-mediated  
1304 apoptosis. *Curr Biol* *12*, 1908-1918.

1305 Hurlock, M.E., Cavka, I., Kursel, L.E., Haversat, J., Wooten, M., Nizami, Z., Turniansky,  
1306 R., Hoess, P., Ries, J., Gall, J.G., *et al.* (2020). Identification of novel synaptonemal  
1307 complex components in *C. elegans*. *J Cell Biol* *219*.

1308 Kim, Y., Kostow, N., and Dernburg, A.F. (2015). The Chromosome Axis Mediates  
1309 Feedback Control of CHK-2 to Ensure Crossover Formation in *C. elegans*. *Dev Cell* *35*,  
1310 247-261.

1311 Norris, A.D., Kim, H.M., Colaiacovo, M.P., and Calarco, J.A. (2015). Efficient Genome  
1312 Editing in *Caenorhabditis elegans* with a Toolkit of Dual-Marker Selection Cassettes.  
1313 *Genetics* 201, 449-458.

1314 Pasierbek, P., Jantsch, M., Melcher, M., Schleiffer, A., Schweizer, D., and Loidl, J.  
1315 (2001). A *Caenorhabditis elegans* cohesion protein with functions in meiotic  
1316 chromosome pairing and disjunction. *Genes & development* 15, 1349-1360.

1317 Penkner, A.M., Fridkin, A., Gloggnitzer, J., Baudrimont, A., Machacek, T., Woglar, A.,  
1318 Csaszar, E., Pasierbek, P., Ammerer, G., Gruenbaum, Y., *et al.* (2009). Meiotic  
1319 chromosome homology search involves modifications of the nuclear envelope protein  
1320 Matefin/SUN-1. *Cell* 139, 920-933.

1321

1322

1323

# Supplemental information

1324

## Supplemental figures and legends.

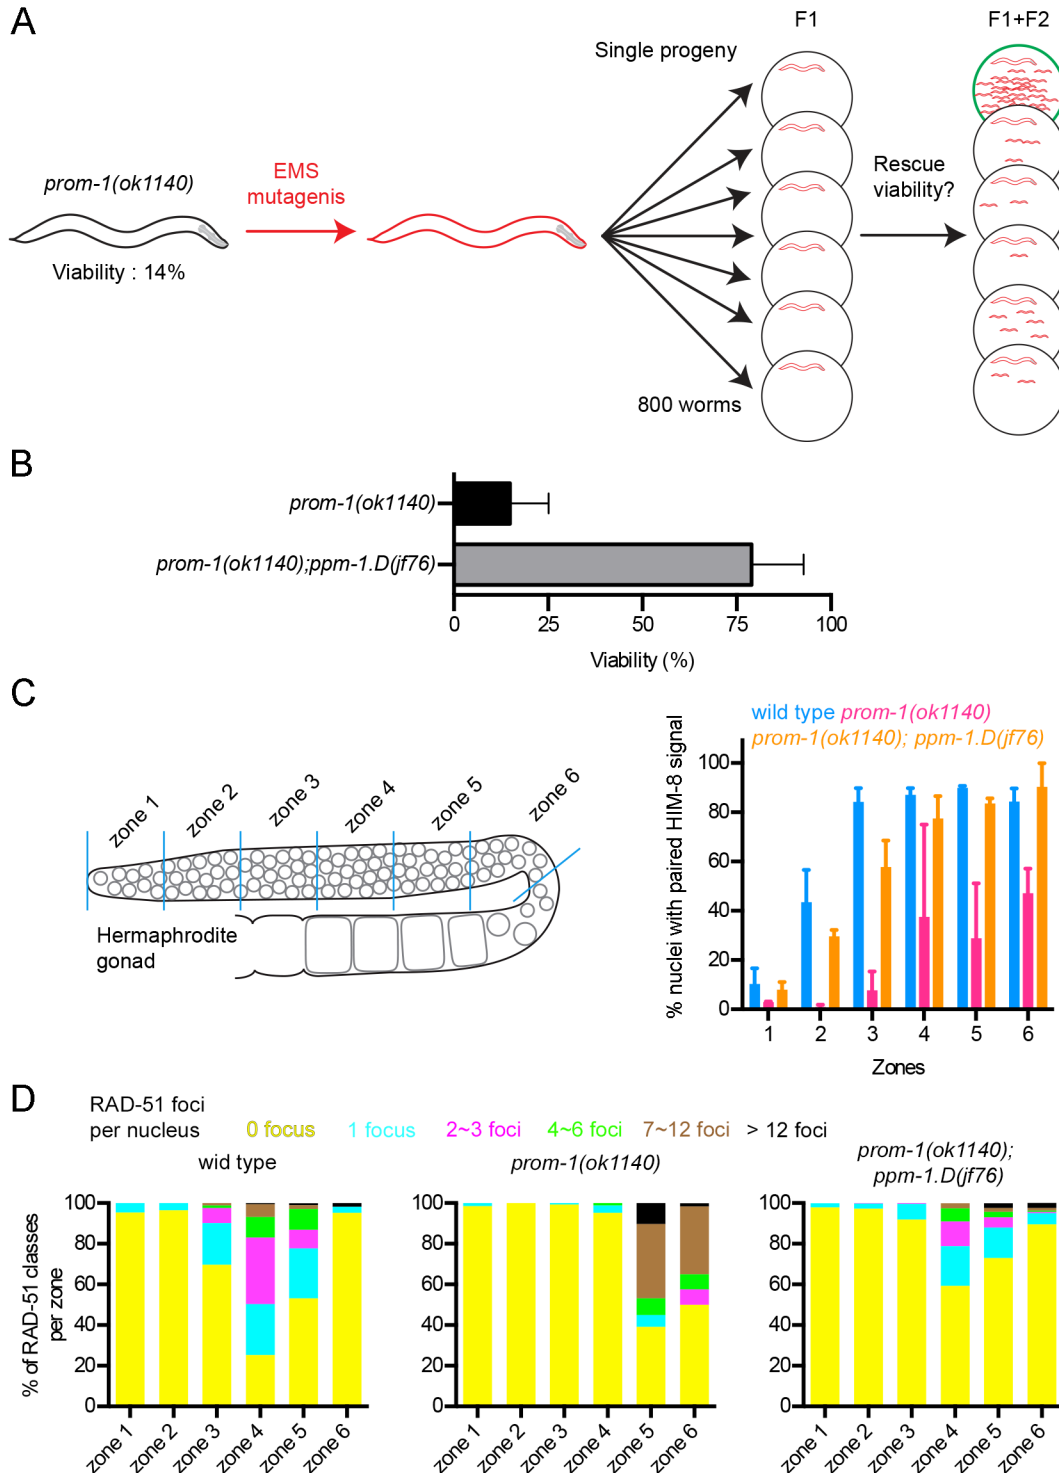

1325

1326 **Figure supplemental 1. Identification of *prom-1* suppressor and characterization**

1327 **of the double mutant *prom-1(ok1140); ppm-1.D(jf76)*.** A. schematics of the

1328 suppressor screen. F1 heterozygotes were singled after mutagenesis and suppressor



1329 candidate plates scores based on the viability/population density on the plates. **B.**  
1330 Viability of *prom-1(ok1140)* and the suppressor line *prom-1(ok1140); ppm-1.D(jf76)*. **C.**  
1331 Left: *C. elegans* hermaphrodite gonad divided into 6 zones of equal lengths. Right:  
1332 percentage of X chromosome pairing (scored with HIM-8) in the different zones for the  
1333 mentioned genotypes. **D.** Quantification of RAD-51 foci counted in the different zones  
1334 for the mentioned genotypes.  
1335

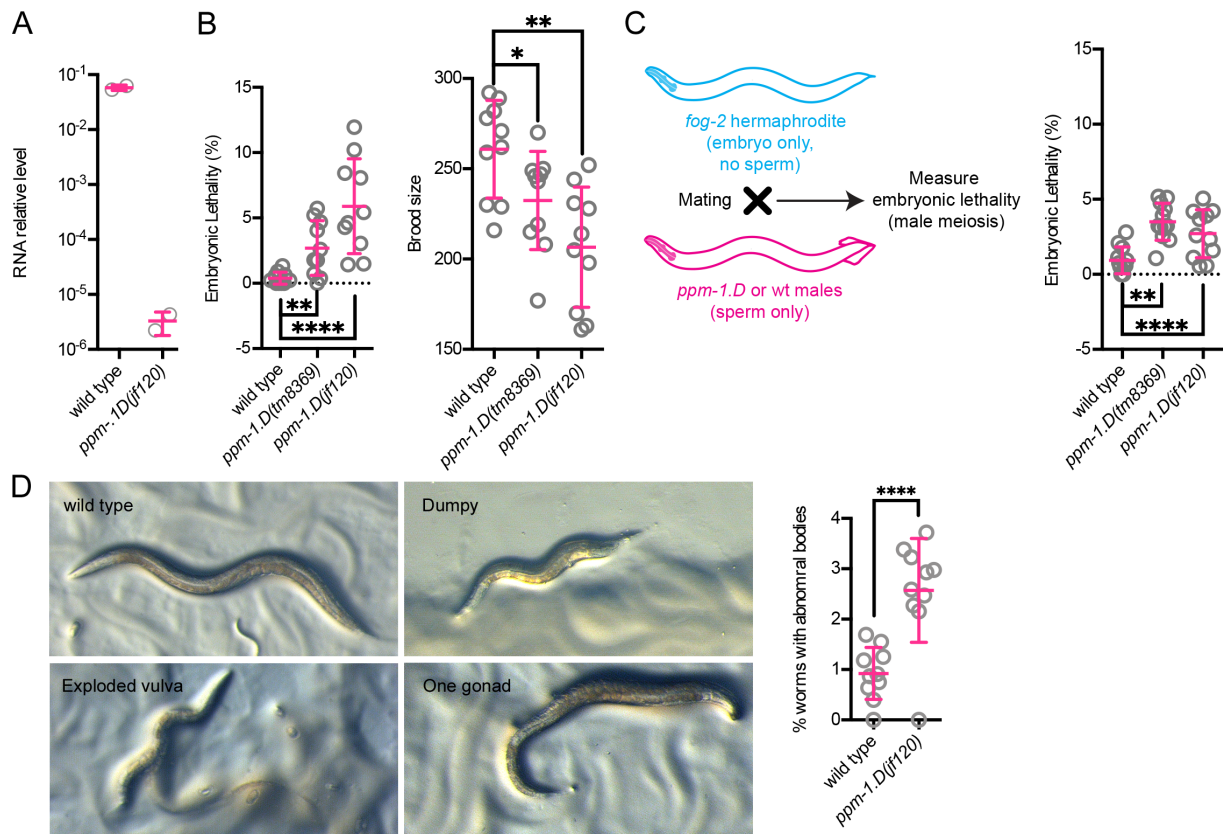

1336  
 1337 **Figure supplemental 2. *ppm-1.d* mutants display low levels of unhatched embryos**  
 1338 **originating from both defects in oogenesis and spermatogenesis. A.** Relative  
 1339 levels of *ppm-1.D* RNA in the mentioned genotypes. **B.** Left. Embryonic lethality in  
 1340 percentage for the mentioned genotypes. Right. Brood size counts for the mentioned  
 1341 genotypes. **C.** Left, *ppm-1.D* mutant males were mated to *fog-2* mutants to test male  
 1342 meiosis. Right, Percentage of non-hatching eggs for the mentioned genotypes. \*, P  
 1343 value < 0.05, \*\*, P value < 0.01, \*\*\*\*, P value < 0.0001 for the Man-Whitney test. **D.** Left,  
 1344 representative pictures of abnormal body morphologies observed in *ppm-1.D(jf120)*.  
 1345 Right, quantification of abnormal *in* wild type and *ppm-1.D(jf120)* worms. 2000  
 1346 synchronized worms were screened for abnormal body morphologies for each  
 1347 genotype. \*\*\*\*, P value < 0.0001 for the Chi-square test.

1348

1349

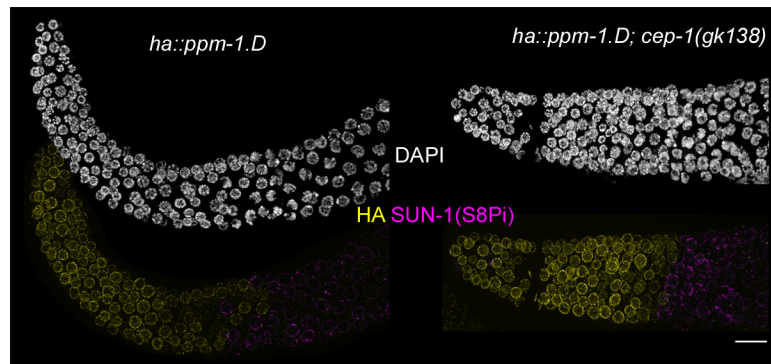

1350  
1351 **Figure S3. PPM-1.D expression in the progenitor zone of is not controlled by cep-**  
1352 **1.** DAPI staining and immuno-staining for HA::PPM-1.D (yellow) and SUN-1(S8Pi)  
1353 (magenta) for the given genotypes. Scale bar: 10  $\mu$ m  
1354

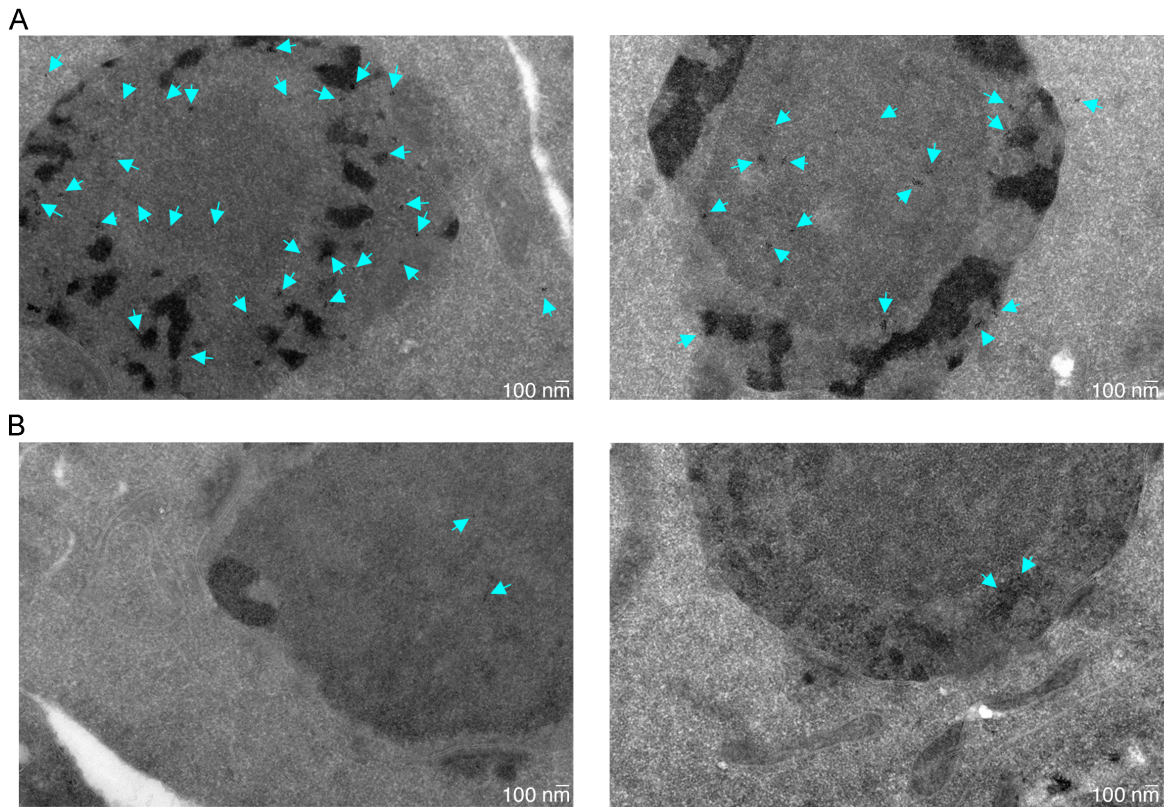

1355  
1356 **Figure Supplemental 4. Specificity of the antibody used in electron microscopy.**  
1357 **A.** Representative pictures of mitotic nuclei at 14,000x resolution with cyan arrows  
1358 highlighting the gold particles linked to the secondary antibody recognizing the primary  
1359 antibody. **B.** Representative pictures of mitotic nuclei at 14,000x resolution with cyan  
1360 arrows highlighting the gold particles linked to the secondary antibody without primary  
1361 antibody.

1362  
1363

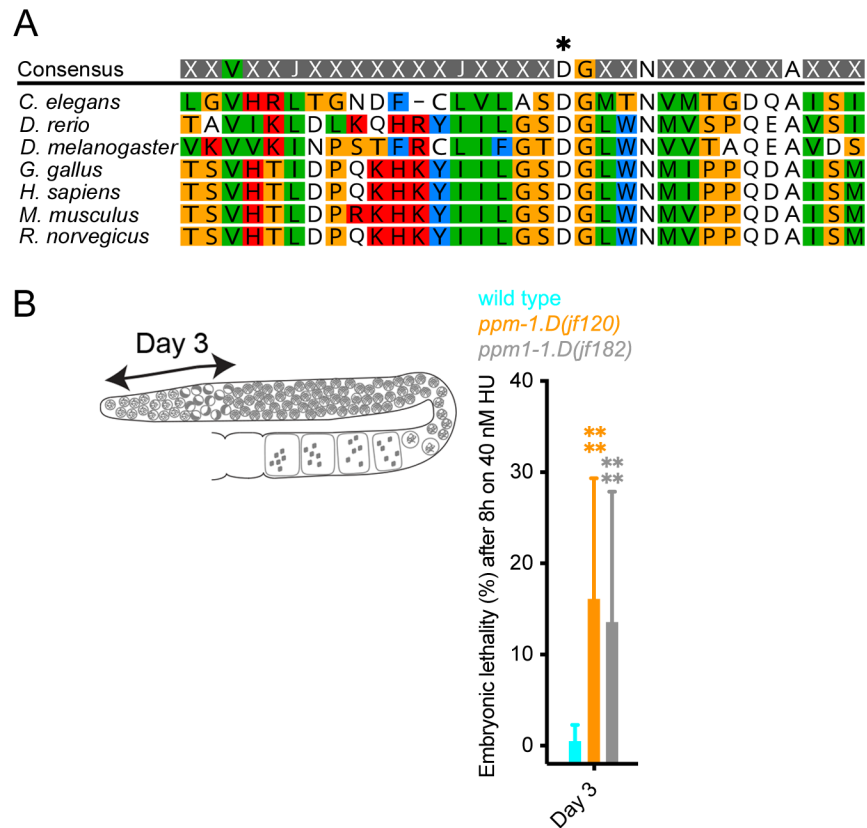

1364  
 1365 **Figure Supplemental 5. Validation of catalytic inactive PPM-1.D.** **A.** Alignment of  
 1366 PPM-1.D protein sequences (amino acids 498 to 530) for the mentioned organisms  
 1367 highlighting the conservation of the PP2C domain. Asterisk marks the conserved  
 1368 aspartic acid required phosphatase activity (Takekawa et al., 2000). **B.** Scheme of *C.*  
 1369 *elegans* germline indicating the position of the nuclei in the gonad at the time of the  
 1370 irradiation and the day at which their embryonic viability can be measured. **C.** Embryonic  
 1371 lethality after 8 hours on 40 nM hydroxy urea 3 days after the stress for the mentioned  
 1372 genotypes. *jf120* allele is a null allele of *ppm-1.D* and *jf182* encodes catalytic inactive  
 1373 PPM-1.D. \*\*\*\*, P value <0.0001 for the Mann-Whitney test.

1374  
 1375

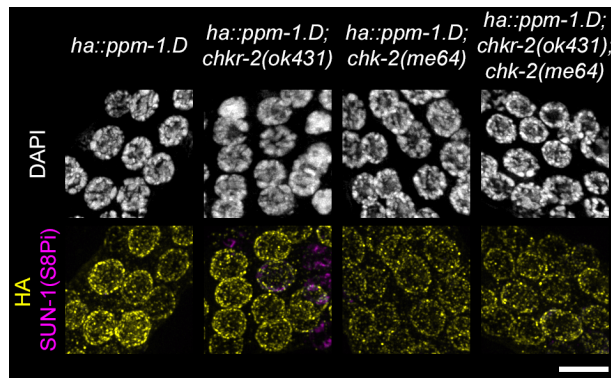

1376

1377 **Figure Supplemental 6. HA::PPM-1.D localization at the nuclear periphery is**  
1378 **independent of *chk-2* and its paralog *chk-2*. DAPI staining and immuno-staining of**  
1379 **HA (yellow) and SUN-1(S8Pi) (magenta) for the given genotypes. Scale bar: 5  $\mu$ m**

1380

1381



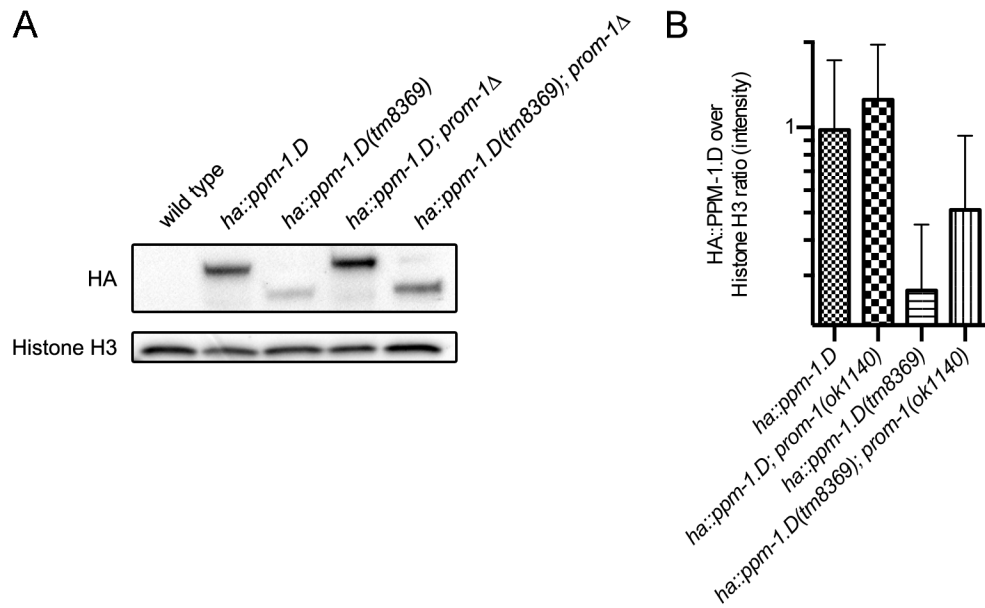

1382  
1383 **Figure supplemental 7. PPM-1.D<sup>truncation</sup> is regulated by the SCF<sup>PROM-1</sup> complex. A.**  
1384 Western blot from whole worm extracts for HA::PPM-1.D and the histone H3. **B.**  
1385 Quantification of the ratio HA::PPM-1.D over histone H3 for the mentioned genotypes.  
1386 Data for both wild type, *ha::ppm-1.D* and *ha::ppm-1.D(tm8369)* are the same as in figure  
1387 4C in **A** and **B**.

1388  
1389

1390 Supplemental tables and legends.

1391

1392 **Table S1.** Viability for the mentioned *C. elegans* strains. Progeny of 10 worms were  
1393 scored.

1394

| Strain genotype                 | Viability (% average $\pm$ SD) |
|---------------------------------|--------------------------------|
| <b>Wild type</b>                | 99.74 $\pm$ 0.24               |
| <i>prom-1::ha</i>               | 99.23 $\pm$ 0.60               |
| <i>ha::ppm-1.D</i>              | 99.66 $\pm$ 0.41               |
| <i>ppm-1.D::ha</i>              | 96.7 $\pm$ 1.70                |
| <i>chk-2::ha</i>                | 97.97 $\pm$ 2.28               |
| <i>ha::ppm-1.D; chk-2::FLAG</i> | 99.84 $\pm$ 0.25               |

1395

1396

397

398 **Table S2.** Peptide spectrum match for the bait and control indicating how often peptide of a given protein was identified in each biological  
 399 replicate. Rank corresponds to the position of the identified protein when proteins are sorted by their abundance (log2 ratio bait over control).  
 400 Statistical analysis was done using LIMMA T-test.

401

| Bait        | Hit     | Rank | Unique Peptides | Bait |    |    | Control |    |    | Log <sub>2</sub> ratio Bait / CTRL | LIMMA p-value | Limma adj. p-value |
|-------------|---------|------|-----------------|------|----|----|---------|----|----|------------------------------------|---------------|--------------------|
|             |         |      |                 | R1   | R2 | R3 | R1      | R2 | R3 |                                    |               |                    |
| HA::PPM-1.D | CHK-2   | 5    | 16              | 10   | 14 | 13 | 0       | 0  | 0  | 5.33                               | 1.15E-03      | 2.85E-01           |
| CHK-2::HA   | PPM-1.D | 1    | 29              | 19   | 21 | 29 | 1       | 0  | 4  | 6.20                               | 3.96E-05      | 2.11E-02           |

402

1403 **Table S3.** P values of the Fisher's Exact test for testing the number of RAD-51 in the  
 1404 mentioned mutants against the wild type. P values below 0.05 are highlighted in bold.  
 1405

| Zone | Genotype               | Number of RAD-51 foci |               |                   |                   |                   |               |
|------|------------------------|-----------------------|---------------|-------------------|-------------------|-------------------|---------------|
|      |                        | 0                     | 1             | 2-3               | 4-6               | 7-12              | >12           |
| 1    | <i>ppm-1.D(tm8369)</i> | 0.6441                | >0.9999       | 0.2907            | >0.9999           | >0.9999           | >0.9999       |
|      | <i>ppm-1.D(jf120)</i>  | 0.0589                | 0.6462        | <b>0.0455</b>     | 0.1046            | >0.9999           | >0.9999       |
| 2    | <i>ppm-1.D(tm8369)</i> | <b>0.0014</b>         | 0.054         | <b>0.006</b>      | >0.9999           | >0.9999           | >0.9999       |
|      | <i>ppm-1.D(jf120)</i>  | <b>0.0038</b>         | <b>0.0155</b> | 0.3044            | >0.9999           | >0.9999           | >0.9999       |
| 3    | <i>ppm-1.D(tm8369)</i> | <b>0.0003</b>         | 0.3613        | <b>0.0003</b>     | <b>0.0259</b>     | >0.9999           | >0.9999       |
|      | <i>ppm-1.D(jf120)</i>  | 0.653                 | 0.5834        | 0.6181            | <b>0.0168</b>     | >0.9999           | 0.421         |
| 4    | <i>ppm-1.D(tm8369)</i> | <b>0.0002</b>         | 0.0756        | 0.4791            | <b>&lt;0.0001</b> | <b>0.0471</b>     | 0.6112        |
|      | <i>ppm-1.D(jf120)</i>  | <b>&lt;0.0001</b>     | <b>0.0006</b> | 0.9254            | <b>&lt;0.0001</b> | <b>&lt;0.0001</b> | >0.9999       |
| 5    | <i>ppm-1.D(tm8369)</i> | <b>&lt;0.0001</b>     | 0.5005        | <b>0.0007</b>     | <b>0.002</b>      | <b>0.0213</b>     | <b>0.0155</b> |
|      | <i>ppm-1.D(jf120)</i>  | <b>&lt;0.0001</b>     | 0.5292        | <b>&lt;0.0001</b> | <b>&lt;0.0001</b> | <b>0.027</b>      | >0.9999       |
| 6    | <i>ppm-1.D(tm8369)</i> | <b>0.0027</b>         | <b>0.0181</b> | >0.9999           | 0.1246            | 0.4997            | 0.2496        |
|      | <i>ppm-1.D(jf120)</i>  | <b>&lt;0.0001</b>     | <b>0.0011</b> | <b>0.0067</b>     | 0.0623            | >0.9999           | >0.9999       |

1406

1407

1408 **Table S4.** Guide, repair template and genotyping primers used in this study in 5' to 3'  
 1409 orientation as DNA sequences.

1410

| Strain                             | crRNA (20 nt + NGG)                          | Repair template                                     | Genotyping primer pair                   |                     |
|------------------------------------|----------------------------------------------|-----------------------------------------------------|------------------------------------------|---------------------|
| <i>prom-1::ha</i>                  | GAGTCAAATTGA                                 | For generation of the repair template the following | AGGAAAACCTCGTGAGGT                       |                     |
|                                    | AGTTATGCCGG                                  | pair of primers were used:                          | GCC                                      |                     |
|                                    |                                              | Right arm forward:                                  |                                          |                     |
|                                    |                                              | CGTCCCAGATTACGCTTAATTAGTGAGAAAA                     | GAGGGGACATTACACCG                        |                     |
|                                    |                                              | TTATTATATCAGTATATAC                                 | TAG                                      |                     |
|                                    |                                              | Right arm reverse:                                  |                                          |                     |
|                                    |                                              | GGAAACAGCTATGACCATGATTACGCCAAG                      |                                          |                     |
|                                    |                                              | CTTGCAAATCTCTCCCTTCCCCTC                            |                                          |                     |
|                                    |                                              | Left arm forward:                                   |                                          |                     |
|                                    |                                              | ACGACGTTGTAAAACGACGGCCAGTGAATT                      |                                          |                     |
|                                    | CACTGGCGTACGAGTCAGGTG                        |                                                     |                                          |                     |
|                                    | Left arm reverse:                            |                                                     |                                          |                     |
|                                    | TAGTCTGGAACGTCGTATGGGTACAGTAGTT              |                                                     |                                          |                     |
|                                    | TCATTAATACTGGCATAAC                          |                                                     |                                          |                     |
| <i>ppm-1.D(jf120)</i>              | TTCGCTAAAAAC                                 | CATTTTCCAGCGATTTTATCGATTTTTTCGCC                    | CTCGTAAAATTTTCAGTCT                      |                     |
|                                    | GAGTAAATCGG                                  | GTTTTTTTGCAGTTTTGAGTTGAAAAATCAA                     | CGGGC                                    |                     |
|                                    |                                              | ATCCCAGACATTGTTTCAGACTTAAAAATGGCA                   |                                          |                     |
|                                    | GACATTGTTCAGAAAAGCTTCATCTCTATCGAAACTGGATGATG | CCCCTCATCATAGTGACG                                  |                                          |                     |
|                                    | CTTAAAAATGG                                  | GAATTATTCGAGTTTCAGAAAATGCAGACGATCATC                |                                          |                     |
|                                    |                                              | AGAAGATGATGATGACGTCAC                               |                                          |                     |
|                                    |                                              |                                                     | AATCGACAATAAATCCTC                       |                     |
|                                    |                                              |                                                     | TCCGC                                    |                     |
|                                    | <i>ppm-1.D(jf183[ha::ppm-1.D])</i>           | GACATTTTTTCAGA                                      | TTTTTTCAGTTTTGAGTTGAAAAATCAAAT           | TGATTTTCAGTGGCTTTCA |
|                                    |                                              | CCTAGAATGG                                          | CCCAGACATTTTCAGACCTAGAATGTACCC           | GACG                |
|                                    |                                              | ATACGACGTCCCAGACTACGCCGAGGAGG                       |                                          |                     |
|                                    |                                              | AGGAGGAGTGCAAACCAGTGAGCCGATGGC                      | TTCCCCAAATTGTATGGG                       |                     |
|                                    |                                              | TCGAACACCCAT                                        | TGTTTCG                                  |                     |
| <i>chk-2(jf184[chk-2::ha])</i>     |                                              | TGAAGTGGTGGG                                        | CCGATTTGACGACAAATTGCGGACTTTTGCG          | GACGCAATTACACCCGAT  |
|                                    |                                              | GACCCACGTGG                                         | GCGGTGAAGTGGTGGGACCCACGTGAAAC            | TTGA                |
|                                    |                                              |                                                     | GTTGTTACAGGCGTAGTCTGGGACGTCGTATG         |                     |
|                                    |                                              |                                                     | GGTATCCTCCTCCTCCTCCCATTTTTGCCTGA         | TACACAAGCTGGACCTGT  |
|                                    |                                              |                                                     | AAATAGGGTTTTTAAGGCTAAA                   | GA                  |
|                                    | <i>ppm-1.D(jf182[ppm-1.D(CD)])</i>           | TTCCATCAGAAGC                                       | GCAGGAGTCCACCGGCTGACAGGAAATGAC           | CGCTGAAAACGCATAAA   |
|                                    |                                              | TAGTACGAGG                                          | TTTTGTCTCGTACTCGTTCAGCTGGAATGA           | ATTACGAA            |
|                                    |                                              |                                                     | CAAATGTAATGACTGGTGATCAAGCAATATC          |                     |
|                                    |                                              |                                                     | A                                        | GGCAAACCTTTCGAATAAA |
|                                    |                                              |                                                     |                                          | TGCCAG              |
|                                    |                                              |                                                     | Digest with <i>PvuII</i> (edited is cut) |                     |
| <i>chk-2(jf185[chk-2::3xFLAG])</i> |                                              | TGAAGTGGTGGG                                        | CCGATTTGACGACAAATTGCGGACTTTTGCG          | GACGCAATTACACCCGAT  |
|                                    |                                              | GACCCACGTGG                                         | GCGGTGAAGTGGTGGGACCCACGTGAAAC            | TTGA                |
|                                    |                                              |                                                     | GTTGTTCACTTGTCGTCGTCCTTGTAGTC            |                     |
|                                    |                                              |                                                     | TCTCCTCCTCCTCCCATTTTTGCCTGAAAAT          | TACACAAGCTGGACCTGT  |
|                                    |                                              | AGGGTTTTTAAGGCTAAA                                  | GA                                       |                     |
|                                    | <i>ppm-1.D(kim61[ppm-1.d::AID::HA])</i>      | ATATGAAAAAAA                                        | GACGATTTTTTGATATATGAAAAAAATGGT           | GAAGATGATGATGACGT   |
|                                    |                                              | TGGTTTGG                                            | TTGGGGAAAGGGAGGCTCAGGAATGCCTAA           | CACTATG             |
|                                    |                                              |                                                     | AGATCCAGCCAAACCTCCGGCCAAGGCACA           |                     |

```
AGTTGTGGGATGGCCACCGGTGAGATCATA TTCAGCCAATTTTCGGG  
CCGGAAGAACGTGATGGTTTCCTGCCAAAA TC  
ATCAAGCGGTGGCCCGGAGGCGGCGGCGTT  
CGTGAAGGGATCGTACCCATATGATGTGCCA  
GATTATGCCTAGTAATAAAGTTTTTTTGAG  
ATTTTTAGACGTT
```

1411



1412 **Table S5.** Primer pair used for qPCR.

1413

| Target RNA              | Primer forward         | Primer reverse             |
|-------------------------|------------------------|----------------------------|
| <i>pmp-3</i>            | GCTGGAGTCACTCATCGTGTT  | AGGACGATCAGTTTCAAGGCA      |
| <i>ppm-1.D(5' part)</i> | CGACGTGTCCAGTGTAGAGTTT | AAATGCGCCATGTTTATGACGAA    |
| <i>ppm-1.D(3' part)</i> | GTAGAACGCTGAACCAATCTCA | ATGATGTTAATGGAGAAGAGGACGAT |
|                         | AG                     |                            |

1414

1415

1416
